# Supplementary material for: Meta-analysis of effects of exclusive breastfeeding on infant gut microbiota across populations
Source: PubMed Central journal article supplement (PMC6177445; doi:10.1038/s41467-018-06473-x), 2018-10-09
Supplement: 41467_2018_6473_MOESM1_ESM.pdf [file 41467_2018_6473_MOESM1_ESM.pdf]

## **SUPPLEMENTARY INFORMATION**

**The effects of exclusive breastfeeding on the infant gut microbiota: a meta-analysis across populations**

**Ho et al.**

## **List of supplementary Tables**

**Supplementary Table 1.** List of shared genera of seven included studies used in the Random Forest models to predict gut microbiota age.

**Supplementary Table 2.** Meta-analysis of all seven included studies for gut bacterial taxa with differential relative abundances between non-exclusively breastfed vs. exclusively breastfed infants  $\leq 6$  months of age.

**Supplementary Table 3.** Meta-analysis of five studies that included a non-breastfeeding group for gut bacterial taxa with trend in relative abundance across exclusive breastfeeding, non-exclusive breastfeeding and non-breastfeeding groups.

**Supplementary Table 4.** Meta-analysis of six studies without data from North Carolina study for gut bacterial taxa with differential relative abundances between non-exclusively breastfed vs. exclusively breastfed infants  $\leq 6$  months of age (sensitivity analysis).

**Supplementary Table 5.** Meta-analysis of six studies without data from Haiti study for gut bacterial taxa with differential relative abundances between non-exclusively breastfed vs. exclusively breastfed infants  $\leq 6$  months of age (sensitivity analysis).

**Supplementary Table 6.** Meta-analysis of six studies without data from VDAART trial study for gut bacterial taxa with differential relative abundances between non-exclusively breastfed vs. exclusively breastfed infants  $\leq 6$  months of age (sensitivity analysis).

**Supplementary Table 7.** Meta-analysis stratified by mode of delivery for gut bacterial taxa with differential relative abundances between non-exclusively breastfed vs. exclusively breastfed infants  $\leq 6$  months of age.

**Supplementary Table 8.** Meta-analysis of all seven included studies for gut bacterial KEGG pathways with differential relative abundances between non-exclusively breastfed vs. exclusively breastfed infants  $\leq 6$  months of age.

**Supplementary Table 9.** Meta-analysis of included studies without data from either North Carolina, Haiti or VDAART trial study for gut bacterial KEGG pathways at level 3 with differential relative abundances between non-exclusively breastfed vs. exclusively breastfed infants  $\leq 6$  months of age (sensitivity analysis).

**Supplementary Table 10.** Meta-analysis stratified by mode of delivery for gut bacterial KEGG pathways with differential relative abundances between non-exclusively breastfed vs. exclusively breastfed infants  $\leq 6$  months of age.

**Supplementary Table 11.** Gut bacterial taxa with differential relative abundances from 6 months to 2 years of age between infants with duration of exclusive breastfeeding  $> 2$  months vs.  $\leq 2$  months from birth.

**Supplementary Table 12.** Breastfeeding is associated with reduced differences in gut bacterial taxa relative abundances between those who had vs. did not have diarrhea at the time of stool sample collection in infants from 6 months to 2 years of age.

**Supplementary Table 13.** Additional summary of included studies.

### **List of Supplementary Figures**

**Supplementary Figure 1.** Meta-analysis of included studies without data from either North Carolina, Haiti or VDAART trial study for microbial alpha diversity difference between non-exclusively breastfed vs. exclusively breastfed infants (sensitivity analysis).

**Supplementary Figure 2.** Meta-analysis stratified by mode of delivery for differences in microbial alpha diversity (Shannon index) between non-exclusively breastfed vs. exclusively breastfed infants  $\leq 6$  months of age.

**Supplementary Figure 3.** Analysis adjusting for infant age vs. analysis adjusting for both infant age and sex for differences in microbial alpha diversity indexes between non-exclusively breastfed vs. exclusively breastfed infants  $\leq 6$  months of age.

**Supplementary Figure 4.** Performance of Random Forest model in prediction of gut microbiota age on the training and test set of Bangladesh data.

**Supplementary Figure 5.** Meta-analysis of included studies without data from either North Carolina, Haiti or VDAART trial study for microbiota age difference between non-exclusively breastfed vs. exclusively breastfed infants (sensitivity analysis).

**Supplementary Figure 6.** Meta-analysis stratified by mode of delivery for differences in microbiota age between non-exclusively breastfed vs. exclusively breastfed infants  $\leq 6$  months of age.

**Supplementary Figure 7.** Analysis adjusting for infant age vs. analysis adjusting for both infant age and sex for differences in microbiota age between non-exclusively breastfed vs. exclusively breastfed infants  $\leq 6$  months of age.

**Supplementary Figure 8.** Meta-analysis of seven included studies for the effects of non-exclusive vs. exclusive breastfeeding on relative abundance of gut bacterial taxa at order level in infants  $\leq 6$  months.

**Supplementary Figure 9.** Meta-analysis of seven included studies for the effects of non-exclusive vs. exclusive breastfeeding on relative abundance of gut bacterial taxa at genus level in infants  $\leq 6$  months.

**Supplementary Figure 10.** Meta-analysis stratified by mode of delivery for the effects of non-exclusive vs. exclusive breastfeeding on relative abundance of gut bacterial taxa at phylum level in infants  $\leq 6$  months.

**Supplementary Figure 11.** Meta-analysis stratified on vaginally delivered infants for the effects of non-exclusive vs. exclusive breastfeeding on relative abundance of gut bacterial taxa at family level in infants  $\leq 6$  months.

**Supplementary Figure 12.** Meta-analysis stratified on C-section delivered infants for the effects of non-exclusive vs. exclusive breastfeeding on relative abundance of gut bacterial taxa at family level in infants  $\leq 6$  months.

**Supplementary Figure 13.** Meta-analysis stratified on vaginally delivered infants for the effects of non-exclusive vs. exclusive breastfeeding on relative abundance of gut bacterial taxa at genus level in infants  $\leq 6$  months.

**Supplementary Figure 14.** Meta-analysis stratified on C-section delivered infants for the effects of non-exclusive vs. exclusive breastfeeding on relative abundance of gut bacterial taxa at genus level in infants  $\leq 6$  months.

**Supplementary Figure 15.** Analysis adjusting for infant age vs. analysis adjusting for both infant age and sex for the effects of non-exclusive vs. exclusive breastfeeding on relative abundance of gut bacterial taxa at phylum level in infants  $\leq 6$  months.

**Supplementary Figure 16.** Meta-analysis of seven included studies for the effects of non-exclusive vs. exclusive breastfeeding on relative abundances of gut microbial KEGG pathways at level two in infants  $\leq 6$  months.

**Supplementary Figure 17.** Analysis adjusting for infant age vs. analysis adjusting for both infant age and sex for the effects of non-exclusive vs. exclusive breastfeeding on relative abundances of gut microbial KEGG pathways at level three in infants  $\leq 6$  months.

**Supplementary Figure 18.** Longer duration of exclusive breastfeeding is associated with reduced effects of diarrhea at the time of stool sample collection on gut microbial diversity of infants from 6 months to 2 years of age.

### **List of Supplementary Notes**

**Supplementary Note 1.** List of Canadian Healthy Infant Longitudinal Development (CHILD) study investigators.

## Supplementary Tables

### Supplementary Table 1. List of shared genera of seven included studies used in the

### Random Forest models to predict gut microbiota age.

| Genera                                                                                                        | Relative importance | Relative Importance (%) |
|---------------------------------------------------------------------------------------------------------------|---------------------|-------------------------|
| k__bacteria.p__firmicutes.c__clostridia.o__clostridiales.f__lachnospiraceae.g__blautia                        | 3264.30             | 27.17                   |
| k__bacteria.p__firmicutes.c__clostridia.o__clostridiales.f__lachnospiraceae.g__                               | 1905.28             | 15.86                   |
| k__bacteria.p__bacteroidetes.c__bacteroidia.o__bacteroidales.f__prevotellaceae.g__prevotella                  | 935.61              | 7.79                    |
| k__bacteria.p__firmicutes.c__clostridia.o__clostridiales.f.g__                                                | 903.01              | 7.52                    |
| k__bacteria.p__firmicutes.c__bacilli.o__bacillales.f__staphylococcaceae.g__staphylococcus                     | 693.06              | 5.77                    |
| k__bacteria.p__firmicutes.c__clostridia.o__clostridiales.f__veillonellaceae.g__dialister                      | 465.34              | 3.87                    |
| k__bacteria.p__firmicutes.c__bacilli.o__lactobacillales.f__lactobacillaceae.g__lactobacillus                  | 430.94              | 3.59                    |
| k__bacteria.p__proteobacteria.c__gammaproteobacteria.o__pasteurellales.f__pasteurellaceae.g__haemophilus      | 412.80              | 3.44                    |
| k__bacteria.p__actinobacteria.c__actinobacteria.o__bifidobacteriales.f__bifidobacteriaceae.g__bifidobacterium | 399.63              | 3.33                    |
| k__bacteria.p__actinobacteria.c__actinobacteria.o__actinomycetales.f__actinomycetaceae.g__actinomyces         | 326.51              | 2.72                    |
| k__bacteria.p__firmicutes.c__clostridia.o__clostridiales.f__lachnospiraceae.g__dorea                          | 232.91              | 1.94                    |
| k__bacteria.p__firmicutes.c__bacilli.o__lactobacillales.f__enterococcaceae.g__enterococcus                    | 211.03              | 1.76                    |
| k__bacteria.p__firmicutes.c__clostridia.o__clostridiales.f__lachnospiraceae.g__coprococcus                    | 184.24              | 1.53                    |
| k__bacteria.p__firmicutes.c__bacilli.o__lactobacillales.f__streptococcaceae.g__streptococcus                  | 180.88              | 1.51                    |
| k__bacteria.p__actinobacteria.c__coriobacteriia.o__coriobacteriales.f__coriobacteriaceae.g__collinsella       | 157.80              | 1.31                    |
| k__bacteria.p__firmicutes.c__clostridia.o__clostridiales.f__veillonellaceae.g__veillonella                    | 157.13              | 1.31                    |
| k__bacteria.p__firmicutes.c__clostridia.o__clostridiales.f__clostridiaceae.g__clostridium                     | 132.33              | 1.10                    |
| k__bacteria.p__firmicutes.c__clostridia.o__clostridiales.f__ruminococcaceae.g__oscullospira                   | 127.32              | 1.06                    |
| k__bacteria.p__bacteroidetes.c__bacteroidia.o__bacteroidales.f__bacteroidaceae.g__bacteroides                 | 125.65              | 1.05                    |
| k__bacteria.p__proteobacteria.c__gammaproteobacteria.o__pseudomonadales.f__pseudomonadaceae.g__pseudomonas    | 117.28              | 0.98                    |
| k__bacteria.p__actinobacteria.c__actinobacteria.o__actinomycetales.f__micrococcaceae.g__rothia                | 105.70              | 0.88                    |
| k__bacteria.p__actinobacteria.c__coriobacteriia.o__coriobacteriales.f__coriobacteriaceae.g__                  | 100.02              | 0.83                    |
| k__bacteria.p__actinobacteria.c__coriobacteriia.o__coriobacteriales.f__coriobacteriaceae.g__atopobium         | 66.97               | 0.56                    |
| k__bacteria.p__proteobacteria.c__betaproteobacteria.o__neisseriales.f__neisseriaceae.g__neisseria             | 59.31               | 0.49                    |
| k__bacteria.p__bacteroidetes.c__bacteroidia.o__bacteroidales.f__porphyromonadaceae.g__parabacteroides         | 54.37               | 0.45                    |
| k__bacteria.p__proteobacteria.c__betaproteobacteria.o__burkholderiales.f__alcaligenaceae.g__sutterella        | 53.38               | 0.44                    |
| k__bacteria.p__fusobacteria.c__fusobacteriia.o__fusobacteriales.f__fusobacteriaceae.g__fusobacterium          | 52.32               | 0.44                    |
| k__bacteria.p__firmicutes.c__bacilli.o__gemellales.f__gemellaceae.g__                                         | 51.81               | 0.43                    |
| k__bacteria.p__firmicutes.c__bacilli.o__lactobacillales.f__streptococcaceae.g__lactococcus                    | 44.64               | 0.37                    |
| k__bacteria.p__bacteroidetes.c__bacteroidia.o__bacteroidales.f__rikenellaceae.g__                             | 32.71               | 0.27                    |
| k__bacteria.p__cyanobacteria.c__chloroplast.o__streptophyta.f.g__                                             | 10.73               | 0.09                    |
| k__bacteria.p__firmicutes.c__clostridia.o__clostridiales.f__veillonellaceae.g__acidaminococcus                | 7.19                | 0.06                    |
| k__bacteria.p__firmicutes.c__clostridia.o__clostridiales.f__lachnospiraceae.g__roseburia                      | 6.31                | 0.05                    |
| k__bacteria.p__firmicutes.c__bacilli.o__lactobacillales.f__carnobacteriaceae.g__granulicatella                | 4.29                | 0.04                    |
| k__bacteria.p__firmicutes.c__bacilli.o__bacillales.f__paenibacillaceae.g__paenibacillus                       | 0.14                | 0.00                    |
| k__bacteria.p__proteobacteria.c__alphaproteobacteria.o__sphingomonadales.f__sphingomonadaceae.g__sphingomonas | 0.11                | 0.00                    |

Full original genera names output from QIIME are shown to facilitate reproducibility.

**Supplementary Table 2. Meta-analysis of all seven included studies for gut bacterial taxa with differential relative abundances between non-exclusively breastfed vs. exclusively breastfed infants  $\leq 6$  months of age.**

| Bacterial taxa |                    |                     |                      | Pooled estimate<br>(log(OR)) | 95% Pooled<br>lower limit | 95% Pooled<br>upper limit | Pooled p-<br>value | FDR adjusted<br>pooled p-value |
|----------------|--------------------|---------------------|----------------------|------------------------------|---------------------------|---------------------------|--------------------|--------------------------------|
| Phylum         | Order              | Family              | Genus                |                              |                           |                           |                    |                                |
| Firmicutes     |                    |                     |                      | 0.25                         | 0.11                      | 0.38                      | 3e-04              | 0.0018                         |
| Bacteroidetes  |                    |                     |                      | 0.21                         | 0.06                      | 0.36                      | 6e-03              | 0.0180                         |
| Order          |                    |                     |                      |                              |                           |                           |                    |                                |
| Firmicutes     | Clostridiales      |                     |                      | 0.30                         | 0.12                      | 0.48                      | 0.0009             | 0.0106                         |
| Bacteroidetes  | Bacteroidales      |                     |                      | 0.21                         | 0.06                      | 0.36                      | 0.0056             | 0.0369                         |
| Firmicutes     | Erysipelotrichales |                     |                      | 0.20                         | 0.02                      | 0.38                      | 0.0253             | 0.1170                         |
| Family         |                    |                     |                      |                              |                           |                           |                    |                                |
| Firmicutes     | Clostridiales      | Veillonellaceae     |                      | 0.23                         | 0.06                      | 0.40                      | 0.0070             | 0.0757                         |
| Bacteroidetes  | Bacteroidales      | Bacteroidaceae      |                      | 0.21                         | 0.05                      | 0.37                      | 0.0090             | 0.0856                         |
| Firmicutes     | Erysipelotrichales | Erysipelotrichaceae |                      | 0.20                         | 0.02                      | 0.38                      | 0.0253             | 0.1748                         |
| Firmicutes     | Clostridiales      | Clostridiaceae      |                      | 0.17                         | 0.00                      | 0.33                      | 0.0496             | 0.3087                         |
| Genus          |                    |                     |                      |                              |                           |                           |                    |                                |
| Firmicutes     | Erysipelotrichales | Erysipelotrichaceae | <i>.eubacterium.</i> | 0.39                         | 0.15                      | 0.64                      | 0.0015             | 0.0561                         |
| Firmicutes     | Clostridiales      | Veillonellaceae     | <i>Megasphaera</i>   | 0.40                         | 0.12                      | 0.68                      | 0.0047             | 0.1115                         |
| Bacteroidetes  | Bacteroidales      | Bacteroidaceae      | <i>Bacteroides</i>   | 0.21                         | 0.05                      | 0.37                      | 0.0090             | 0.1220                         |
| Firmicutes     | Clostridiales      | Lachnospiraceae     | <i>Clostridium</i>   | 0.35                         | 0.05                      | 0.64                      | 0.0218             | 0.2513                         |
| Firmicutes     | Clostridiales      | Veillonellaceae     | <i>Veillonella</i>   | 0.21                         | 0.01                      | 0.42                      | 0.0386             | 0.3598                         |

Only those with pooled p-values <0.05 are shown. OR: odds ratio; FDR: false discovery rate.



**Supplementary Table 3. Meta-analysis of five studies that included a non-breastfeeding group for gut bacterial taxa with trend in relative abundance across exclusive breastfeeding, non-exclusive breastfeeding and non-breastfeeding groups.**

| Bacterial taxa  |                    |                       |                       | Pooled estimate<br>(log(OR)) | 95% Pooled<br>lower limit | 95% Pooled<br>upper limit | Pooled p-<br>value | FDR adjusted<br>p-value |
|-----------------|--------------------|-----------------------|-----------------------|------------------------------|---------------------------|---------------------------|--------------------|-------------------------|
| Phylum          | Order              | Family                | Genus                 |                              |                           |                           |                    |                         |
| Firmicutes      |                    |                       |                       | 0.29                         | 0.13                      | 0.45                      | 0.0004             | 0.0022                  |
| Verrucomicrobia |                    |                       |                       | 0.19                         | 0.03                      | 0.35                      | 0.0172             | 0.0517                  |
| Bacteroidetes   |                    |                       |                       | 0.22                         | 0.02                      | 0.41                      | 0.0277             | 0.0553                  |
| Order           |                    |                       |                       |                              |                           |                           |                    |                         |
| Firmicutes      | Clostridiales      |                       |                       | 0.39                         | 0.27                      | 0.52                      | <0.0001            | <0.0001                 |
| Actinobacteria  | Coriobacteriales   |                       |                       | 0.32                         | 0.21                      | 0.42                      | <0.0001            | <0.0001                 |
| Proteobacteria  | Pasteurellales     |                       |                       | -0.22                        | -0.34                     | -0.09                     | 0.0007             | 0.0045                  |
| Firmicutes      | Bacillales         |                       |                       | -0.17                        | -0.28                     | -0.07                     | 0.0009             | 0.0050                  |
| Verrucomicrobia | Verrucomicrobiales |                       |                       | 0.19                         | 0.03                      | 0.35                      | 0.0172             | 0.0637                  |
| Bacteroidetes   | Bacteroidales      |                       |                       | 0.23                         | 0.02                      | 0.44                      | 0.0339             | 0.0965                  |
| Firmicutes      | Erysipelotrichales |                       |                       | 0.20                         | 0.01                      | 0.39                      | 0.0392             | 0.0966                  |
| Family          |                    |                       |                       |                              |                           |                           |                    |                         |
| Actinobacteria  | Coriobacteriales   | Coriobacteriaceae     |                       | 0.32                         | 0.21                      | 0.42                      | <0.0001            | <0.0001                 |
| Proteobacteria  | Pasteurellales     | Pasteurellaceae       |                       | -0.22                        | -0.34                     | -0.09                     | 0.0007             | 0.0070                  |
| Firmicutes      | Bacillales         | Staphylococcaceae     |                       | -0.18                        | -0.30                     | -0.07                     | 0.0021             | 0.0160                  |
| Firmicutes      | Clostridiales      | Peptostreptococcaceae |                       | 0.19                         | 0.05                      | 0.33                      | 0.0084             | 0.0577                  |
| Verrucomicrobia | Verrucomicrobiales | Verrucomicrobiaceae   |                       | 0.19                         | 0.03                      | 0.35                      | 0.0172             | 0.0873                  |
| Firmicutes      | Clostridiales      | Ruminococcaceae       |                       | 0.20                         | 0.03                      | 0.38                      | 0.0194             | 0.0923                  |
| Firmicutes      | Clostridiales      | Clostridiaceae        |                       | 0.14                         | 0.01                      | 0.27                      | 0.0334             | 0.1234                  |
| Firmicutes      | Clostridiales      | Lachnospiraceae       |                       | 0.34                         | 0.03                      | 0.65                      | 0.0341             | 0.1234                  |
| Firmicutes      | Erysipelotrichales | Erysipelotrichaceae   |                       | 0.20                         | 0.01                      | 0.39                      | 0.0392             | 0.1240                  |
| Genus           |                    |                       |                       |                              |                           |                           |                    |                         |
| Firmicutes      | Clostridiales      | Lachnospiraceae       | <i>Coprococcus</i>    | 0.33                         | 0.32                      | 0.34                      | <0.0001            | <0.0001                 |
| Firmicutes      | Clostridiales      | Lachnospiraceae       | <i>Blautia</i>        | 0.38                         | 0.25                      | 0.51                      | <0.0001            | <0.0001                 |
| Firmicutes      | Erysipelotrichales | Erysipelotrichaceae   | <i>.eubacterium.</i>  | 0.38                         | 0.23                      | 0.53                      | <0.0001            | <0.0001                 |
| Firmicutes      | Clostridiales      | Lachnospiraceae       | <i>Unassigned</i>     | 0.34                         | 0.18                      | 0.49                      | <0.0001            | 0.0003                  |
| Proteobacteria  | Pasteurellales     | Pasteurellaceae       | <i>Haemophilus</i>    | -0.23                        | -0.36                     | -0.10                     | 0.0005             | 0.0064                  |
| Firmicutes      | Bacillales         | Staphylococcaceae     | <i>Staphylococcus</i> | -0.18                        | -0.30                     | -0.07                     | 0.0021             | 0.0196                  |
| Verrucomicrobia | Verrucomicrobiales | Verrucomicrobiaceae   | <i>Akkermansia</i>    | 0.19                         | 0.03                      | 0.35                      | 0.0169             | 0.1167                  |
| Firmicutes      | Clostridiales      | Peptostreptococcaceae | <i>Unassigned</i>     | 0.29                         | 0.01                      | 0.57                      | 0.0390             | 0.1823                  |

Five studies included are Bangladesh, Canada, USA (California-Florida), USA (California-Massachusetts –Missouri), USA (North Carolina).

In each study, to test for trend across breastfeeding categories, breastfeeding was coded as a continuous variable in the model (exclusive breastfeeding (EBF)=1, non-EBF=2 and non-BF=3).

Only those with pooled p-values <0.05 are shown. OR: odds ratio; FDR: false discovery rate.

**Supplementary Table 4. Meta-analysis of six studies without data from North Carolina study for gut bacterial taxa with differential relative abundances between non-exclusively breastfed vs. exclusively breastfed infants  $\leq 6$  months of age (sensitivity analysis).**

| Bacterial taxa |                    |                     |                      | Pooled estimate<br>(log(OR)) | 95% Pooled<br>lower limit | 95% Pooled<br>upper limit | Pooled p-value | FDR adjusted<br>pooled p-value |
|----------------|--------------------|---------------------|----------------------|------------------------------|---------------------------|---------------------------|----------------|--------------------------------|
| Phylum         | Order              | Family              | Genus                |                              |                           |                           |                |                                |
| Firmicutes     |                    |                     |                      | 0.25                         | 0.11                      | 0.38                      | 0.0004         | 0.0025                         |
| Bacteroidetes  |                    |                     |                      | 0.19                         | 0.04                      | 0.34                      | 0.0114         | 0.0399                         |
| Order          |                    |                     |                      |                              |                           |                           |                |                                |
| Firmicutes     | Clostridiales      |                     |                      | 0.28                         | 0.11                      | 0.46                      | 0.0015         | 0.0233                         |
| Bacteroidetes  | Bacteroidales      |                     |                      | 0.20                         | 0.05                      | 0.35                      | 0.0106         | 0.0873                         |
| Firmicutes     | Erysipelotrichales |                     |                      | 0.20                         | 0.02                      | 0.38                      | 0.0285         | 0.1638                         |
| Family         |                    |                     |                      |                              |                           |                           |                |                                |
| Bacteroidetes  | Bacteroidales      | Bacteroidaceae      |                      | 0.19                         | 0.03                      | 0.35                      | 0.0169         | 0.2092                         |
| Firmicutes     | Clostridiales      | Veillonellaceae     |                      | 0.22                         | 0.04                      | 0.41                      | 0.0176         | 0.2092                         |
| Firmicutes     | Erysipelotrichales | Erysipelotrichaceae |                      | 0.20                         | 0.02                      | 0.38                      | 0.0285         | 0.2460                         |
| Genus          |                    |                     |                      |                              |                           |                           |                |                                |
| Firmicutes     | Erysipelotrichales | Erysipelotrichaceae | <i>.eubacterium.</i> | 0.40                         | 0.15                      | 0.65                      | 0.0019         | 0.0888                         |
| Firmicutes     | Clostridiales      | Veillonellaceae     | <i>Megasphaera</i>   | 0.40                         | 0.12                      | 0.68                      | 0.0047         | 0.1804                         |
| Firmicutes     | Clostridiales      | Clostridiaceae      | <i>Unassigned</i>    | 0.24                         | 0.06                      | 0.43                      | 0.0101         | 0.2417                         |
| Bacteroidetes  | Bacteroidales      | Bacteroidaceae      | <i>Bacteroides</i>   | 0.19                         | 0.03                      | 0.35                      | 0.0169         | 0.2804                         |
| Firmicutes     | Clostridiales      | Lachnospiraceae     | <i>Clostridium</i>   | 0.35                         | 0.05                      | 0.64                      | 0.0218         | 0.3203                         |

Only those with pooled p-values <0.05 are shown. OR: odds ratio; FDR: false discovery rate.

**Supplementary Table 5. Meta-analysis of six studies without data from Haiti study for gut bacterial taxa with differential relative abundances between non-exclusively breastfed vs. exclusively breastfed infants  $\leq 6$  months of age (sensitivity analysis).**

| Bacterial taxa |                    |                     |                      | Pooled estimate<br>(log(OR)) | 95% Pooled<br>lower limit | 95% Pooled<br>upper limit | Pooled p-value | FDR adjusted<br>pooled p-value |
|----------------|--------------------|---------------------|----------------------|------------------------------|---------------------------|---------------------------|----------------|--------------------------------|
| Phylum         | Order              | Family              | Genus                |                              |                           |                           |                |                                |
| Firmicutes     |                    |                     |                      | 0.26                         | 0.12                      | 0.40                      | 0.0002         | 0.0013                         |
| Bacteroidetes  |                    |                     |                      | 0.21                         | 0.06                      | 0.36                      | 0.0055         | 0.0165                         |
| Order          |                    |                     |                      |                              |                           |                           |                |                                |
| Firmicutes     | Clostridiales      |                     |                      | 0.32                         | 0.18                      | 0.46                      | <0.0001        | 0.0001                         |
| Bacteroidetes  | Bacteroidales      |                     |                      | 0.22                         | 0.07                      | 0.37                      | 0.0043         | 0.0325                         |
| Firmicutes     | Erysipelotrichales |                     |                      | 0.18                         | 0.00                      | 0.36                      | 0.0444         | 0.2108                         |
| Family         |                    |                     |                      |                              |                           |                           |                |                                |
| Bacteroidetes  | Bacteroidales      | Bacteroidaceae      |                      | 0.21                         | 0.04                      | 0.37                      | 0.0123         | 0.1348                         |
| Firmicutes     | Clostridiales      | Veillonellaceae     |                      | 0.21                         | 0.02                      | 0.40                      | 0.0335         | 0.2947                         |
| Firmicutes     | Erysipelotrichales | Erysipelotrichaceae |                      | 0.18                         | 0.00                      | 0.36                      | 0.0444         | 0.2947                         |
| Firmicutes     | Clostridiales      | Clostridiaceae      |                      | 0.17                         | 0.00                      | 0.34                      | 0.0459         | 0.2947                         |
| Genus          |                    |                     |                      |                              |                           |                           |                |                                |
| Firmicutes     | Clostridiales      | Veillonellaceae     | <i>Megasphaera</i>   | 0.45                         | 0.15                      | 0.75                      | 0.0029         | 0.1063                         |
| Firmicutes     | Erysipelotrichales | Erysipelotrichaceae | <i>.eubacterium.</i> | 0.36                         | 0.11                      | 0.61                      | 0.0056         | 0.1063                         |
| Bacteroidetes  | Bacteroidales      | Bacteroidaceae      | <i>Bacteroides</i>   | 0.21                         | 0.04                      | 0.37                      | 0.0123         | 0.1862                         |
| Firmicutes     | Clostridiales      | Lachnospiraceae     | <i>Clostridium</i>   | 0.36                         | 0.06                      | 0.65                      | 0.0194         | 0.2677                         |
| Firmicutes     | Clostridiales      | Lachnospiraceae     | <i>Coprococcus</i>   | 0.52                         | 0.05                      | 0.99                      | 0.0303         | 0.3840                         |
| Firmicutes     | Clostridiales      | Clostridiaceae      | <i>Unassigned</i>    | 0.53                         | 0.03                      | 1.04                      | 0.0388         | 0.3878                         |

Only those with pooled p-values <0.05 are shown. OR: odds ratio; FDR: false discovery rate.

**Supplementary Table 6. Meta-analysis of six studies without data from VDAART trial study for gut bacterial taxa with differential relative abundances between non-exclusively breastfed vs. exclusively breastfed infants  $\leq 6$  months of age (sensitivity analysis).**

| Bacterial taxa |                    |                     |                        | Pooled estimate<br>(log(OR)) | 95% Pooled<br>lower limit | 95% Pooled<br>upper limit | Pooled p-value | FDR adjusted<br>pooled p-value |
|----------------|--------------------|---------------------|------------------------|------------------------------|---------------------------|---------------------------|----------------|--------------------------------|
| Phylum         | Order              | Family              | Genus                  |                              |                           |                           |                |                                |
| Bacteroidetes  |                    |                     |                        | 0.23                         | 0.07                      | 0.39                      | 0.0043         | 0.0251                         |
| Firmicutes     |                    |                     |                        | 0.20                         | 0.05                      | 0.35                      | 0.0072         | 0.0251                         |
| Order          |                    |                     |                        |                              |                           |                           |                |                                |
| Bacteroidetes  | Bacteroidales      |                     |                        | 0.23                         | 0.07                      | 0.39                      | 0.0040         | 0.0549                         |
| Firmicutes     | Clostridiales      |                     |                        | 0.30                         | 0.08                      | 0.51                      | 0.0069         | 0.0549                         |
| Actinobacteria | Actinomycetales    |                     |                        | -0.16                        | -0.28                     | -0.03                     | 0.0156         | 0.1025                         |
| Firmicutes     | Erysipelotrichales |                     |                        | 0.21                         | 0.02                      | 0.41                      | 0.0331         | 0.1692                         |
| Firmicutes     | Bacillales         |                     |                        | -0.21                        | -0.41                     | -0.01                     | 0.0427         | 0.1965                         |
| Family         |                    |                     |                        |                              |                           |                           |                |                                |
| Firmicutes     | Clostridiales      | Veillonellaceae     |                        | 0.30                         | 0.15                      | 0.44                      | 0.0001         | 0.0050                         |
| Bacteroidetes  | Bacteroidales      | Bacteroidaceae      |                        | 0.24                         | 0.07                      | 0.41                      | 0.0064         | 0.0851                         |
| Firmicutes     | Erysipelotrichales | Erysipelotrichaceae |                        | 0.21                         | 0.02                      | 0.41                      | 0.0331         | 0.2621                         |
| Genus          |                    |                     |                        |                              |                           |                           |                |                                |
| Firmicutes     | Clostridiales      | Veillonellaceae     | <i>Acidaminococcus</i> | 2.06                         | 0.93                      | 3.19                      | 0.0003         | 0.0306                         |
| Firmicutes     | Erysipelotrichales | Erysipelotrichaceae | <i>.eubacterium.</i>   | 0.41                         | 0.14                      | 0.68                      | 0.0025         | 0.1074                         |
| Firmicutes     | Clostridiales      | Veillonellaceae     | <i>Megasphaera</i>     | 0.45                         | 0.14                      | 0.77                      | 0.0051         | 0.1074                         |
| Bacteroidetes  | Bacteroidales      | Bacteroidaceae.     | <i>Bacteroides</i>     | 0.24                         | 0.07                      | 0.41                      | 0.0064         | 0.1074                         |
| Firmicutes     | Clostridiales      | Veillonellaceae     | <i>Veillonella</i>     | 0.26                         | 0.05                      | 0.47                      | 0.0162         | 0.2080                         |
| Firmicutes     | Clostridiales      | Lachnospiraceae     | <i>Clostridium</i>     | 0.35                         | 0.05                      | 0.64                      | 0.0218         | 0.2616                         |
| Firmicutes     | Clostridiales      | Lachnospiraceae     | <i>Coprococcus</i>     | 0.55                         | 0.04                      | 1.05                      | 0.0334         | 0.3167                         |

VDAART trial study is also referred to as USA(California-Massachusetts-Missouri) in manuscript text. Only those with pooled p-values <0.05 are shown. OR: odds ratio; FDR: false discovery rate.

**Supplementary Table 7. Meta-analysis stratified by mode of delivery for gut bacterial taxa with differential relative abundances between non-exclusively breastfed vs. exclusively breastfed infants  $\leq 6$  months of age.**

|                               |                    |                     |                              | Pooled estimate (log(OR)) | 95% Pooled lower limit | 95% Pooled upper limit | Pooled p-value | FDR adjusted pooled p-value |
|-------------------------------|--------------------|---------------------|------------------------------|---------------------------|------------------------|------------------------|----------------|-----------------------------|
| <b>Vaginally born infants</b> |                    |                     |                              |                           |                        |                        |                |                             |
| Phylum                        | Order              | Family              | Genus                        |                           |                        |                        |                |                             |
| Proteobacteria                |                    |                     |                              | -0.31                     | -0.51                  | -0.11                  | 0.0025         | 0.0178                      |
| <b>Order</b>                  |                    |                     |                              |                           |                        |                        |                |                             |
| Proteobacteria                | Enterobacteriales  |                     |                              | -0.30                     | -0.51                  | -0.09                  | 0.0054         | 0.1158                      |
| Firmicutes                    | Erysipelotrichales |                     |                              | 0.28                      | 0.04                   | 0.52                   | 0.0217         | 0.2337                      |
| <b>Family</b>                 |                    |                     |                              |                           |                        |                        |                |                             |
| Firmicutes                    | Bacillales         | Staphylococcaceae   |                              | -0.33                     | -0.56                  | -0.10                  | 0.0046         | 0.1157                      |
| Proteobacteria                | Enterobacteriales  | Enterobacteriaceae  |                              | -0.30                     | -0.51                  | -0.09                  | 0.0054         | 0.1157                      |
| Bacteroidetes                 | Bacteroidales      | Bacteroidaceae      |                              | 0.30                      | 0.08                   | 0.52                   | 0.0064         | 0.1157                      |
| Firmicutes                    | Clostridiales      | Eubacteriaceae      |                              | 0.80                      | 0.19                   | 1.42                   | 0.0104         | 0.1577                      |
| Firmicutes                    | Erysipelotrichales | Erysipelotrichaceae |                              | 0.28                      | 0.04                   | 0.52                   | 0.0217         | 0.2198                      |
| <b>Genus</b>                  |                    |                     |                              |                           |                        |                        |                |                             |
| Firmicutes                    | Clostridiales      | Veillonellaceae     | <i>Acidaminococcus</i>       | 3.37                      | 2.53                   | 4.21                   | <0.0001        | <0.0001                     |
| Firmicutes                    | Bacillales         | Staphylococcaceae   | <i>Staphylococcus</i>        | -0.33                     | -0.56                  | -0.10                  | 0.0046         | 0.1176                      |
| Firmicutes                    | Clostridiales      | Eubacteriaceae      | <i>Eubacterium</i>           | 0.88                      | 0.26                   | 1.50                   | 0.0055         | 0.1176                      |
| Firmicutes                    | Clostridiales      | Lachnospiraceae     | <i>Unassigned</i>            | 0.32                      | 0.09                   | 0.55                   | 0.0063         | 0.1176                      |
| Bacteroidetes                 | Bacteroidales      | Bacteroidaceae      | <i>Bacteroides</i>           | 0.30                      | 0.08                   | 0.52                   | 0.0064         | 0.1176                      |
| Firmicutes                    | Erysipelotrichales | Erysipelotrichaceae | <i>.eubacterium.</i>         | 0.54                      | 0.14                   | 0.94                   | 0.0079         | 0.1327                      |
| Proteobacteria                | Enterobacteriales  | Enterobacteriaceae  | <i>Unassigned</i>            | -0.29                     | -0.51                  | -0.06                  | 0.0127         | 0.1802                      |
| Firmicutes                    | Clostridiales      | Clostridiaceae      | <i>Unassigned</i>            | 0.30                      | 0.06                   | 0.55                   | 0.0145         | 0.1921                      |
| Proteobacteria                | Pasteurellales     | Pasteurellaceae     | <i>Aggregatibacter</i>       | 0.57                      | 0.09                   | 1.06                   | 0.0209         | 0.2234                      |
| Firmicutes                    | Lactobacillales    | Streptococcaceae    | <i>Lactococcus</i>           | 0.58                      | 0.06                   | 1.11                   | 0.0293         | 0.2849                      |
| Firmicutes                    | Clostridiales      | Lachnospiraceae     | <i>Blautia</i>               | 0.36                      | 0.00                   | 0.73                   | 0.0490         | 0.4534                      |
| <b>C-section born infants</b> |                    |                     |                              |                           |                        |                        |                |                             |
| Phylum                        |                    |                     |                              |                           |                        |                        |                |                             |
| Proteobacteria                |                    |                     |                              | -0.72                     | -1.05                  | -0.38                  | <0.0001        | 0.0002                      |
| <b>Order</b>                  |                    |                     |                              |                           |                        |                        |                |                             |
| Proteobacteria                | Enterobacteriales  |                     |                              | -0.58                     | -1.03                  | -0.12                  | 0.0127         | 0.1562                      |
| <b>Family</b>                 |                    |                     |                              |                           |                        |                        |                |                             |
| Proteobacteria                | Enterobacteriales  | Enterobacteriaceae  |                              | -0.58                     | -1.03                  | -0.12                  | 0.0127         | 0.2596                      |
| <b>Genus</b>                  |                    |                     |                              |                           |                        |                        |                |                             |
| Proteobacteria                | Enterobacteriales  | Enterobacteriaceae  | <i>Proteus</i>               | -0.26                     | -0.26                  | -0.26                  | <0.0001        | <0.0001                     |
| Firmicutes                    | Clostridiales      | Ruminococcaceae     | <i>Anaerotruncus</i>         | -2.92                     | -4.31                  | -1.54                  | <0.0001        | 0.0019                      |
| Firmicutes                    | Clostridiales      | Veillonellaceae     | <i>Phascolarctobacterium</i> | -1.88                     | -3.56                  | -0.20                  | 0.0279         | 0.6490                      |
| Proteobacteria                | Enterobacteriales  | Enterobacteriaceae  | <i>Unassigned</i>            | -0.52                     | -1.03                  | -0.01                  | 0.0451         | 0.9154                      |

Four studies included are Canada, Haiti, USA (California-Florida), USA (California-Massachusetts -Missouri).

Only those with pooled p-values <0.05 are shown. OR: odds ratio; FDR: false discovery rate.

**Supplementary Table 8. Meta-analysis of all seven included studies for gut bacterial KEGG pathways with differential relative abundances between non-exclusively breastfed vs. exclusively breastfed infants  $\leq 6$  months of age.**

| KEGG pathway                                                                                  | Pooled estimate (log(OR)) | 95% Pooled lower limit | 95% Pooled upper limit | Pooled p-value | FDR adjusted pooled p-value |
|-----------------------------------------------------------------------------------------------|---------------------------|------------------------|------------------------|----------------|-----------------------------|
| <b>Level 2 KEGG pathway</b>                                                                   |                           |                        |                        |                |                             |
| Environmental Information Processing; Signaling Molecules and Interaction                     | -0.05                     | -0.08                  | -0.01                  | 0.0056         | 0.1417                      |
| Genetic Information Processing; Transcription                                                 | 0.02                      | 0.00                   | 0.03                   | 0.0077         | 0.1417                      |
| Metabolism; Carbohydrate Metabolism                                                           | 0.01                      | 0.00                   | 0.03                   | 0.0290         | 0.3580                      |
| <b>Level 3 KEGG pathway</b>                                                                   |                           |                        |                        |                |                             |
| Metabolism; Carbohydrate Metabolism; Fructose and mannose metabolism                          | 0.08                      | 0.05                   | 0.11                   | <0.0001        | 0.0001                      |
| Cellular Processes; Transport and Catabolism; Peroxisome                                      | -0.06                     | -0.09                  | -0.03                  | <0.0001        | 0.0021                      |
| Metabolism; Lipid Metabolism; Fatty acid metabolism                                           | -0.09                     | -0.14                  | -0.04                  | 0.0002         | 0.0180                      |
| Metabolism; Carbohydrate Metabolism; Pentose and glucuronate interconversions                 | 0.06                      | 0.03                   | 0.10                   | 0.0007         | 0.0380                      |
| Metabolism; Lipid Metabolism; Fatty acid biosynthesis                                         | 0.04                      | 0.02                   | 0.07                   | 0.0009         | 0.0380                      |
| Metabolism; Metabolism of Cofactors and Vitamins; Vitamin B6 metabolism                       | -0.03                     | -0.05                  | -0.01                  | 0.0011         | 0.0390                      |
| Metabolism; Metabolism of Terpenoids and Polyketides; Biosynthesis of ansamycins              | 0.08                      | 0.03                   | 0.13                   | 0.0014         | 0.0441                      |
| Metabolism; Carbohydrate Metabolism; Pentose phosphate pathway                                | 0.04                      | 0.01                   | 0.06                   | 0.0021         | 0.0595                      |
| Genetic Information Processing; Translation; Ribosome biogenesis in eukaryotes                | -0.07                     | -0.12                  | -0.02                  | 0.0041         | 0.1012                      |
| Organismal Systems; Endocrine System; Adipocytokine signaling pathway                         | -0.12                     | -0.20                  | -0.04                  | 0.0048         | 0.1080                      |
| Genetic Information Processing; Replication and Repair; Base excision repair                  | 0.01                      | 0.00                   | 0.03                   | 0.0058         | 0.1178                      |
| Metabolism; Xenobiotics Biodegradation and Metabolism; Xylene degradation                     | -0.04                     | -0.08                  | -0.01                  | 0.0125         | 0.2194                      |
| Metabolism; Energy Metabolism; Carbon fixation in photosynthetic organisms                    | 0.03                      | 0.01                   | 0.06                   | 0.0129         | 0.2194                      |
| Metabolism; Xenobiotics Biodegradation and Metabolism; Drug metabolism (other enzymes)        | 0.03                      | 0.01                   | 0.06                   | 0.0138         | 0.2194                      |
| Unclassified; Genetic Information Processing; Protein folding and associated processing       | -0.01                     | -0.02                  | 0.00                   | 0.0210         | 0.3120                      |
| Metabolism; Metabolism of Cofactors and Vitamins; Nicotinate and nicotinamide metabolism      | -0.03                     | -0.06                  | 0.00                   | 0.0265         | 0.3293                      |
| Unclassified; Cellular Processes and Signaling; Inorganic ion transport and metabolism        | -0.07                     | -0.14                  | -0.01                  | 0.0270         | 0.3293                      |
| Organismal Systems; Endocrine System; Insulin signaling pathway                               | 0.06                      | 0.01                   | 0.11                   | 0.0286         | 0.3293                      |
| Metabolism; Carbohydrate Metabolism; Amino sugar and nucleotide sugar metabolism              | 0.03                      | 0.00                   | 0.06                   | 0.0316         | 0.3293                      |
| Metabolism; Metabolism of Other Amino Acids; D Alanine metabolism                             | 0.02                      | 0.00                   | 0.04                   | 0.0320         | 0.3293                      |
| Metabolism; Xenobiotics Biodegradation and Metabolism; Drug metabolism (cytochrome P450)      | -0.10                     | -0.19                  | -0.01                  | 0.0326         | 0.3293                      |
| Metabolism; Xenobiotics Biodegradation and Metabolism; Toluene degradation                    | -0.07                     | -0.14                  | -0.01                  | 0.0337         | 0.3293                      |
| Metabolism; Lipid Metabolism; Glycerolipid metabolism                                         | 0.03                      | 0.00                   | 0.07                   | 0.0340         | 0.3293                      |
| Metabolism; Glycan Biosynthesis and Metabolism; Glycosphingolipid biosynthesis (globo series) | 0.08                      | 0.00                   | 0.16                   | 0.0459         | 0.4265                      |

Only those with pooled p-values <0.05 are shown. KEGG: Kyoto Encyclopedia of Genes and Genomes; OR: odds ratio; FDR: false discovery rate.

**Supplementary Table 9. Meta-analysis of included studies without data from either North Carolina, Haiti or VDAART trial study for gut bacterial KEGG pathways at level 3 with differential relative abundances between non-exclusively breastfed vs. exclusively breastfed infants  $\leq 6$  months of age (sensitivity analysis).**

| Level 3 KEGG pathways                                                                               | Pooled estimate (log(OR)) | 95% Pooled lower limit | 95% Pooled upper limit | Pooled p-value | FDR adjusted pooled p-value |
|-----------------------------------------------------------------------------------------------------|---------------------------|------------------------|------------------------|----------------|-----------------------------|
| <b>Meta-analysis without North Carolina data</b>                                                    |                           |                        |                        |                |                             |
| Metabolism; Carbohydrate Metabolism; Fructose and mannose metabolism                                | 0.07                      | 0.04                   | 0.10                   | <0.0001        | 0.0002                      |
| Cellular Processes; Transport and Catabolism; Peroxisome                                            | -0.06                     | -0.09                  | -0.03                  | <0.0001        | 0.0026                      |
| Metabolism; Lipid Metabolism; Fatty acid metabolism                                                 | -0.09                     | -0.14                  | -0.04                  | 0.0008         | 0.0596                      |
| Genetic Information Processing; Replication and Repair; Base excision repair                        | 0.02                      | 0.01                   | 0.03                   | 0.0019         | 0.0875                      |
| Metabolism; Carbohydrate Metabolism; Pentose and glucuronate interconversions                       | 0.06                      | 0.02                   | 0.10                   | 0.0021         | 0.0875                      |
| Metabolism; Metabolism of Terpenoids and Polyketides; Biosynthesis of ansamycins                    | 0.08                      | 0.03                   | 0.12                   | 0.0023         | 0.0875                      |
| Metabolism; Metabolism of Cofactors and Vitamins; Vitamin B6 metabolism                             | -0.03                     | -0.05                  | -0.01                  | 0.0030         | 0.0954                      |
| Metabolism; Lipid Metabolism; Fatty acid biosynthesis                                               | 0.04                      | 0.01                   | 0.07                   | 0.0038         | 0.1005                      |
| Genetic Information Processing; Translation; Ribosome biogenesis in eukaryotes                      | -0.07                     | -0.12                  | -0.02                  | 0.0040         | 0.1005                      |
| Metabolism; Carbohydrate Metabolism; Pentose phosphate pathway                                      | 0.03                      | 0.01                   | 0.06                   | 0.0057         | 0.1298                      |
| Metabolism; Metabolism of Other Amino Acids; D Alanine metabolism                                   | 0.02                      | 0.00                   | 0.04                   | 0.0227         | 0.4660                      |
| Unclassified; Genetic Information Processing; Protein folding and associated processing             | -0.01                     | -0.02                  | 0.00                   | 0.0270         | 0.5078                      |
| Metabolism; Xenobiotics Biodegradation and Metabolism; Drug metabolism...other enzymes              | 0.03                      | 0.00                   | 0.06                   | 0.0321         | 0.5078                      |
| Organismal Systems; Endocrine System; Adipocytokine signaling pathway                               | -0.10                     | -0.20                  | -0.01                  | 0.0351         | 0.5078                      |
| Metabolism; Energy Metabolism; Carbon fixation in photosynthetic organisms                          | 0.03                      | 0.00                   | 0.05                   | 0.0357         | 0.5078                      |
| Metabolism; Xenobiotics Biodegradation and Metabolism; Drug metabolism (cytochrome P450)            | -0.10                     | -0.19                  | -0.01                  | 0.0359         | 0.5078                      |
| Human Diseases; Infectious Diseases; Epithelial cell signaling in Helicobacter pylori infection     | 0.05                      | 0.00                   | 0.09                   | 0.0414         | 0.5378                      |
| Metabolism; Metabolism of Cofactors and Vitamins; Nicotinate and nicotinamide metabolism            | -0.03                     | -0.06                  | 0.00                   | 0.0447         | 0.5378                      |
| Metabolism; Carbohydrate Metabolism; Amino sugar and nucleotide sugar metabolism                    | 0.03                      | 0.00                   | 0.06                   | 0.0488         | 0.5378                      |
| <b>Meta-analysis without Haiti data</b>                                                             |                           |                        |                        |                |                             |
| Metabolism; Carbohydrate Metabolism; Fructose and mannose metabolism                                | 0.08                      | 0.05                   | 0.11                   | <0.0001        | 0.0002                      |
| Cellular Processes; Transport and Catabolism; Peroxisome                                            | -0.07                     | -0.09                  | -0.04                  | <0.0001        | 0.0016                      |
| Metabolism; Lipid Metabolism; Fatty acid metabolism                                                 | -0.09                     | -0.14                  | -0.05                  | <0.0001        | 0.0031                      |
| Metabolism; Carbohydrate Metabolism; Pentose and glucuronate interconversions                       | 0.07                      | 0.03                   | 0.10                   | 0.0003         | 0.0161                      |
| Metabolism; Metabolism of Terpenoids and Polyketides; Biosynthesis of ansamycins                    | 0.09                      | 0.04                   | 0.14                   | 0.0004         | 0.0184                      |
| Metabolism; Carbohydrate Metabolism; Pentose phosphate pathway                                      | 0.04                      | 0.02                   | 0.06                   | 0.0009         | 0.0302                      |
| Organismal Systems; Environmental Adaptation; Plant pathogen interaction                            | 0.05                      | 0.02                   | 0.07                   | 0.0009         | 0.0302                      |
| Metabolism; Lipid Metabolism; Fatty acid biosynthesis                                               | 0.04                      | 0.02                   | 0.07                   | 0.0019         | 0.0528                      |
| Organismal Systems; Endocrine System; Adipocytokine signaling pathway                               | -0.13                     | -0.21                  | -0.05                  | 0.0025         | 0.0617                      |
| Genetic Information Processing; Translation; Ribosome biogenesis in eukaryotes                      | -0.07                     | -0.12                  | -0.02                  | 0.0034         | 0.0767                      |
| Metabolism; Metabolism of Cofactors and Vitamins; Vitamin B6 metabolism                             | -0.03                     | -0.05                  | -0.01                  | 0.0039         | 0.0791                      |
| Metabolism; Metabolism of Cofactors and Vitamins; Porphyrin and chlorophyll metabolism              | 0.06                      | 0.02                   | 0.11                   | 0.0051         | 0.0960                      |
| Metabolism; Energy Metabolism; Carbon fixation in photosynthetic organisms                          | 0.04                      | 0.01                   | 0.06                   | 0.0057         | 0.0975                      |
| Metabolism; Xenobiotics Biodegradation and Metabolism; Drug metabolism...other enzymes              | 0.04                      | 0.01                   | 0.06                   | 0.0074         | 0.1192                      |
| Genetic Information Processing; Replication and Repair; Base excision repair                        | 0.01                      | 0.00                   | 0.03                   | 0.0099         | 0.1481                      |
| Metabolism; Metabolism of Cofactors and Vitamins; Biotin metabolism                                 | 0.04                      | 0.01                   | 0.08                   | 0.0140         | 0.1955                      |
| Unclassified; Cellular Processes and Signaling; Inorganic ion transport and metabolism              | -0.09                     | -0.16                  | -0.01                  | 0.0188         | 0.2441                      |
| Metabolism; Lipid Metabolism; Glycerolipid metabolism                                               | 0.04                      | 0.01                   | 0.07                   | 0.0196         | 0.2441                      |
| Metabolism; Xenobiotics Biodegradation and Metabolism; Toluene degradation                          | -0.08                     | -0.15                  | -0.01                  | 0.0227         | 0.2625                      |
| Metabolism; Xenobiotics Biodegradation and Metabolism; Drug metabolism... cytochrome P450           | -0.11                     | -0.20                  | -0.01                  | 0.0234         | 0.2625                      |
| Organismal Systems; Endocrine System; Insulin signaling pathway                                     | 0.06                      | 0.01                   | 0.11                   | 0.0281         | 0.2935                      |
| Unclassified; Genetic Information Processing; Protein folding and associated processing             | -0.01                     | -0.02                  | 0.00                   | 0.0288         | 0.2935                      |
| Metabolism; Metabolism of Other Amino Acids; D Alanine metabolism                                   | 0.02                      | 0.00                   | 0.04                   | 0.0329         | 0.3200                      |
| Metabolism; Amino Acid Metabolism; Glycine; serine and threonine metabolism                         | -0.02                     | -0.03                  | 0.00                   | 0.0357         | 0.3249                      |
| Metabolism; Metabolism of Cofactors and Vitamins; Nicotinate and nicotinamide metabolism            | -0.03                     | -0.06                  | 0.00                   | 0.0369         | 0.3249                      |
| Metabolism; Xenobiotics Biodegradation and Metabolism; Metabolism of xenobiotics by cytochrome P450 | -0.10                     | -0.19                  | -0.01                  | 0.0387         | 0.3249                      |
| Genetic Information Processing; Translation; RNA transport                                          | 0.06                      | 0.00                   | 0.12                   | 0.0392         | 0.3249                      |
| Metabolism; Metabolism of Terpenoids and Polyketides; Tetracycline biosynthesis                     | 0.06                      | 0.00                   | 0.11                   | 0.0460         | 0.3515                      |
| Genetic Information Processing; Folding; Sorting and Degradation; Proteasome                        | -0.10                     | -0.19                  | 0.00                   | 0.0466         | 0.3515                      |
| Human Diseases; Infectious Diseases; Epithelial cell signaling in Helicobacter pylori infection     | 0.05                      | 0.00                   | 0.09                   | 0.0475         | 0.3515                      |
| Metabolism; Carbohydrate Metabolism; Amino sugar and nucleotide sugar metabolism                    | 0.03                      | 0.00                   | 0.06                   | 0.0486         | 0.3515                      |
| <b>Meta-analysis without VDAART trial data</b>                                                      |                           |                        |                        |                |                             |
| Metabolism; Carbohydrate Metabolism; Fructose and mannose metabolism                                | 0.07                      | 0.04                   | 0.10                   | <0.0001        | 0.0002                      |
| Cellular Processes; Transport and Catabolism; Peroxisome                                            | -0.06                     | -0.09                  | -0.03                  | 0.0002         | 0.0210                      |
| Metabolism; Xenobiotics Biodegradation and Metabolism; Xylene degradation                           | -0.06                     | -0.09                  | -0.02                  | 0.0026         | 0.1577                      |
| Metabolism; Lipid Metabolism; Fatty acid metabolism                                                 | -0.09                     | -0.15                  | -0.03                  | 0.0028         | 0.1577                      |
| Genetic Information Processing; Folding; Sorting and Degradation; Chaperones and folding catalysts  | 0.02                      | 0.01                   | 0.04                   | 0.0036         | 0.1577                      |
| Genetic Information Processing; Translation; Ribosome biogenesis in eukaryotes                      | -0.07                     | -0.12                  | -0.02                  | 0.0043         | 0.1577                      |
| Metabolism; Carbohydrate Metabolism; Pentose and glucuronate interconversions                       | 0.05                      | 0.02                   | 0.09                   | 0.0051         | 0.1577                      |
| Metabolism; Lipid Metabolism; Fatty acid biosynthesis                                               | 0.05                      | 0.01                   | 0.08                   | 0.0056         | 0.1577                      |
| Metabolism; Metabolism of Terpenoids and Polyketides; Biosynthesis of ansamycins                    | 0.07                      | 0.02                   | 0.13                   | 0.0090         | 0.2250                      |
| Metabolism; Metabolism of Cofactors and Vitamins; Vitamin B6 metabolism                             | -0.02                     | -0.04                  | -0.01                  | 0.0104         | 0.2302                      |
| Metabolism; Metabolism of Cofactors and Vitamins; Biotin metabolism                                 | 0.05                      | 0.01                   | 0.09                   | 0.0118         | 0.2302                      |

| <b>Level 3 KEGG pathways</b>                                                                     | <b>Pooled estimate<br/>(log(OR))</b> | <b>95% Pooled lower<br/>limit</b> | <b>95% Pooled upper<br/>limit</b> | <b>Pooled p-<br/>value</b> | <b>FDR adjusted pooled<br/>p-<br/>value</b> |
|--------------------------------------------------------------------------------------------------|--------------------------------------|-----------------------------------|-----------------------------------|----------------------------|---------------------------------------------|
| Metabolism; Carbohydrate Metabolism; Pentose phosphate pathway                                   | 0.03                                 | 0.01                              | 0.06                              | 0.0122                     | 0.2302                                      |
| Metabolism; Xenobiotics Biodegradation and Metabolism; Drug metabolism...other enzymes           | 0.04                                 | 0.01                              | 0.07                              | 0.0171                     | 0.2974                                      |
| Metabolism; Xenobiotics Biodegradation and Metabolism; Chloroalkane and chloroalkene degradation | -0.04                                | -0.08                             | -0.01                             | 0.0187                     | 0.3025                                      |
| Genetic Information Processing; Replication and Repair; Base excision repair                     | 0.01                                 | 0.00                              | 0.03                              | 0.0214                     | 0.3222                                      |
| Metabolism; Xenobiotics Biodegradation and Metabolism; Drug metabolism...cytochrome P450         | -0.10                                | -0.20                             | -0.01                             | 0.0313                     | 0.4117                                      |
| Environmental Information Processing; Signal Transduction; Phosphatidylinositol signaling system | 0.02                                 | 0.00                              | 0.03                              | 0.0314                     | 0.4117                                      |
| Metabolism; Energy Metabolism; Carbon fixation in photosynthetic organisms                       | 0.03                                 | 0.00                              | 0.07                              | 0.0328                     | 0.4117                                      |
| Metabolism; Metabolism of Other Amino Acids; D Alanine metabolism                                | 0.02                                 | 0.00                              | 0.04                              | 0.0363                     | 0.4323                                      |
| Genetic Information Processing; Folding; Sorting and Degradation; Proteasome                     | -0.10                                | -0.20                             | 0.00                              | 0.0427                     | 0.4829                                      |

VDAART trial study is also referred to as USA(California-Massachusetts-Missouri) in manuscript text. Only those with pooled p-values <0.05 are shown. KEGG: Kyoto Encyclopedia of Genes

and Genomes; OR: odds ratio; FDR: false discovery rate.



## Supplementary Table 10. Meta-analysis stratified by mode of delivery for gut bacterial

### KEGG pathways with differential relative abundances between non-exclusively breastfed

vs. exclusively breastfed infants  $\leq 6$  months of age.

|                                                                                              | Pooled estimate<br>(log(OR)) | 95% Pooled lower limit | 95% Pooled upper limit | Pooled p-value | FDR adjusted pooled p-value |
|----------------------------------------------------------------------------------------------|------------------------------|------------------------|------------------------|----------------|-----------------------------|
| <b>Vaginal born infants</b>                                                                  |                              |                        |                        |                |                             |
| Level 2 KEGG pathways                                                                        |                              |                        |                        |                |                             |
| Human Diseases; Infectious Diseases                                                          | -0.05                        | -0.08                  | -0.02                  | 0.0005         | 0.0189                      |
| Human Diseases; Neurodegenerative Diseases                                                   | -0.08                        | -0.14                  | -0.03                  | 0.0033         | 0.0631                      |
| Unclassified; Genetic Information Processing                                                 | -0.02                        | -0.04                  | 0.00                   | 0.0152         | 0.1607                      |
| Environmental Information Processing; Signal Transduction                                    | -0.06                        | -0.10                  | -0.01                  | 0.0169         | 0.1607                      |
| Metabolism; Metabolism of Other Amino Acids                                                  | -0.02                        | -0.03                  | 0.00                   | 0.0280         | 0.2126                      |
| Level 3 KEGG pathways                                                                        |                              |                        |                        |                |                             |
| Metabolism; Carbohydrate Metabolism; Pentose phosphate pathway                               | 0.05                         | 0.03                   | 0.06                   | <0.0001        | 0.0001                      |
| Metabolism; Carbohydrate Metabolism; Propanoate metabolism                                   | -0.06                        | -0.08                  | -0.03                  | <0.0001        | 0.0026                      |
| Metabolism; Lipid Metabolism; Fatty acid metabolism                                          | -0.10                        | -0.16                  | -0.04                  | 0.0005         | 0.0371                      |
| Metabolism; Carbohydrate Metabolism; Fructose and mannose metabolism                         | 0.07                         | 0.03                   | 0.12                   | 0.0010         | 0.0593                      |
| Unclassified; Cellular Processes and Signaling; Sporulation                                  | 0.27                         | 0.10                   | 0.44                   | 0.0022         | 0.0994                      |
| Metabolism; Carbohydrate Metabolism; Amino sugar and nucleotide sugar metabolism             | 0.04                         | 0.01                   | 0.07                   | 0.0026         | 0.0994                      |
| Metabolism; Enzyme Families; Peptidases                                                      | 0.02                         | 0.01                   | 0.04                   | 0.0032         | 0.1053                      |
| Metabolism; Metabolism of Cofactors and Vitamins; Pantothenate and CoA biosynthesis          | 0.02                         | 0.01                   | 0.04                   | 0.0079         | 0.2155                      |
| Metabolism; Energy Metabolism; Carbon fixation in photosynthetic organisms                   | 0.03                         | 0.01                   | 0.06                   | 0.0093         | 0.2155                      |
| Metabolism; Carbohydrate Metabolism; Butanoate metabolism                                    | -0.04                        | -0.07                  | -0.01                  | 0.0106         | 0.2155                      |
| Metabolism; Metabolism of Other Amino Acids; Glutathione metabolism                          | -0.08                        | -0.13                  | -0.02                  | 0.0111         | 0.2155                      |
| Metabolism; Amino Acid Metabolism; Tryptophan metabolism                                     | -0.10                        | -0.18                  | -0.02                  | 0.0116         | 0.2155                      |
| Metabolism; Amino Acid Metabolism; Lysine degradation                                        | -0.09                        | -0.17                  | -0.02                  | 0.0130         | 0.2155                      |
| Environmental Information Processing; Membrane Transport; Bacterial secretion system         | -0.05                        | -0.09                  | -0.01                  | 0.0132         | 0.2155                      |
| Unclassified; Genetic Information Processing; Replication; recombination and repair proteins | -0.04                        | -0.08                  | -0.01                  | 0.0144         | 0.2198                      |
| Environmental Information Processing; Signal Transduction; Two component system              | -0.06                        | -0.11                  | -0.01                  | 0.0203         | 0.2911                      |
| Metabolism; Carbohydrate Metabolism; Pentose and glucuronate interconversions                | 0.06                         | 0.01                   | 0.11                   | 0.0249         | 0.3300                      |
| Metabolism; Lipid Metabolism; Sphingolipid metabolism                                        | 0.10                         | 0.01                   | 0.18                   | 0.0259         | 0.3300                      |
| Metabolism; Metabolism of Terpenoids and Polyketides; Limonene and pinene degradation        | -0.08                        | -0.16                  | -0.01                  | 0.0353         | 0.4255                      |
| Metabolism; Amino Acid Metabolism; Valine; leucine and isoleucine degradation                | -0.09                        | -0.17                  | 0.00                   | 0.0394         | 0.4327                      |
| Metabolism; Energy Metabolism; Methane metabolism                                            | 0.04                         | 0.00                   | 0.07                   | 0.0403         | 0.4327                      |
| Metabolism; Metabolism of Cofactors and Vitamins; Vitamin B6 metabolism                      | -0.03                        | -0.06                  | 0.00                   | 0.0428         | 0.4327                      |
| Organismal Systems; Endocrine System; Insulin signaling pathway                              | 0.07                         | 0.00                   | 0.14                   | 0.0453         | 0.4327                      |
| Environmental Information Processing; Membrane Transport; Secretion system                   | -0.05                        | -0.10                  | 0.00                   | 0.0463         | 0.4327                      |
| Metabolism; Metabolism of Terpenoids and Polyketides; Biosynthesis of ansamycins             | 0.08                         | 0.00                   | 0.16                   | 0.0472         | 0.4327                      |
| <b>C-section born infants</b>                                                                |                              |                        |                        |                |                             |
| Level 2 KEGG pathways                                                                        |                              |                        |                        |                |                             |
| Human Diseases; Infectious Diseases                                                          | -0.11                        | -0.16                  | -0.06                  | <0.0001        | 0.0005                      |
| Environmental Information Processing; Signal Transduction                                    | -0.14                        | -0.21                  | -0.07                  | 0.0001         | 0.0028                      |
| Unclassified; Poorly Characterized                                                           | -0.18                        | -0.32                  | -0.04                  | 0.0092         | 0.0868                      |
| Metabolism; Energy Metabolism                                                                | 0.04                         | 0.01                   | 0.07                   | 0.0110         | 0.0868                      |
| Human Diseases; Neurodegenerative Diseases                                                   | -0.14                        | -0.25                  | -0.03                  | 0.0114         | 0.0868                      |
| Genetic Information Processing; Replication and Repair                                       | 0.11                         | 0.01                   | 0.20                   | 0.0258         | 0.1311                      |
| Metabolism; Nucleotide Metabolism                                                            | 0.11                         | 0.01                   | 0.21                   | 0.0258         | 0.1311                      |
| Metabolism; Amino Acid Metabolism                                                            | 0.03                         | 0.00                   | 0.05                   | 0.0297         | 0.1311                      |
| Unclassified; Cellular Processes and Signaling                                               | -0.15                        | -0.29                  | -0.01                  | 0.0335         | 0.1311                      |
| Metabolism; Carbohydrate Metabolism                                                          | 0.03                         | 0.00                   | 0.05                   | 0.0345         | 0.1311                      |
| Level 3 KEGG pathways                                                                        |                              |                        |                        |                |                             |
| Metabolism; Amino Acid Metabolism; Lysine degradation                                        | -0.24                        | -0.36                  | -0.13                  | <0.0001        | 0.0052                      |
| Environmental Information Processing; Membrane Transport; Secretion system                   | -0.17                        | -0.25                  | -0.09                  | <0.0001        | 0.0052                      |
| Cellular Processes; Cell Motility; Cytoskeleton interconversions                             | 0.19                         | 0.10                   | 0.29                   | 0.0001         | 0.0080                      |
| Environmental Information Processing; Signal Transduction; Two component system              | -0.16                        | -0.24                  | -0.07                  | 0.0002         | 0.0103                      |
| Metabolism; Amino Acid Metabolism; Lysine biosynthesis                                       | 0.09                         | 0.04                   | 0.14                   | 0.0004         | 0.0148                      |
| Metabolism; Amino Acid Metabolism; Tryptophan metabolism                                     | -0.22                        | -0.34                  | -0.10                  | 0.0004         | 0.0148                      |
| Metabolism; Metabolism of Cofactors and Vitamins; Thiamine metabolism                        | 0.08                         | 0.03                   | 0.12                   | 0.0006         | 0.0201                      |
| Metabolism; Lipid Metabolism; Biosynthesis of unsaturated fatty acids                        | -0.16                        | -0.25                  | -0.07                  | 0.0009         | 0.0249                      |
| Metabolism; Xenobiotics Biodegradation and Metabolism; Drug metabolism (other enzymes)       | 0.07                         | 0.03                   | 0.11                   | 0.0010         | 0.0253                      |
| Metabolism; Lipid Metabolism; Fatty acid metabolism                                          | -0.15                        | -0.24                  | -0.06                  | 0.0012         | 0.0267                      |
| Genetic Information Processing; Folding; Sorting and Degradation; Sulfur relay system        | -0.14                        | -0.22                  | -0.05                  | 0.0015         | 0.0300                      |
| Metabolism; Carbohydrate Metabolism; Galactose metabolism                                    | 0.12                         | 0.04                   | 0.19                   | 0.0016         | 0.0300                      |
| Genetic Information Processing; Replication and Repair; Mismatch repair                      | 0.08                         | 0.03                   | 0.14                   | 0.0020         | 0.0348                      |
| Metabolism; Enzyme Families; Peptidases                                                      | 0.04                         | 0.01                   | 0.06                   | 0.0022         | 0.0362                      |
| Unclassified; Cellular Processes and Signaling; Inorganic ion transport and metabolism       | -0.23                        | -0.38                  | -0.08                  | 0.0025         | 0.0379                      |
| Metabolism; Biosynthesis of Other Secondary Metabolites; Phenylpropanoid biosynthesis        | 0.16                         | 0.06                   | 0.27                   | 0.0028         | 0.0379                      |
| Genetic Information Processing; Replication and Repair; Nucleotide excision repair           | 0.19                         | 0.07                   | 0.31                   | 0.0028         | 0.0379                      |
| Metabolism; Carbohydrate Metabolism; Amino sugar and nucleotide sugar metabolism             | 0.09                         | 0.03                   | 0.14                   | 0.0031         | 0.0379                      |
| Genetic Information Processing; Replication and Repair; DNA replication proteins             | 0.07                         | 0.02                   | 0.12                   | 0.0031         | 0.0379                      |
| Unclassified; Cellular Processes and Signaling; Sporulation                                  | 0.43                         | 0.13                   | 0.72                   | 0.0048         | 0.0548                      |
| Unclassified; Cellular Processes and Signaling; Other ion coupled transporters               | -0.11                        | -0.18                  | -0.03                  | 0.0055         | 0.0596                      |
| Metabolism; Amino Acid Metabolism; Valine; leucine and isoleucine degradation                | -0.15                        | -0.25                  | -0.04                  | 0.0067         | 0.0667                      |
| Metabolism; Metabolism of Other Amino Acids; Glutathione metabolism                          | -0.12                        | -0.21                  | -0.03                  | 0.0067         | 0.0667                      |
| Metabolism; Energy Metabolism; Carbon fixation in photosynthetic organisms                   | 0.05                         | 0.01                   | 0.09                   | 0.0070         | 0.0667                      |
| Unclassified; Metabolism; Metabolism of cofactors and vitamins                               | -0.13                        | -0.23                  | -0.04                  | 0.0075         | 0.0682                      |
| Human Diseases; Infectious Diseases; Vibrio cholerae pathogenic cycle                        | -0.13                        | -0.22                  | -0.03                  | 0.0079         | 0.0692                      |
| Metabolism; Nucleotide Metabolism; Pyrimidine metabolism                                     | 0.11                         | 0.03                   | 0.19                   | 0.0101         | 0.0816                      |
| Metabolism; Amino Acid Metabolism; Phenylalanine; tyrosine and tryptophan biosynthesis       | 0.08                         | 0.02                   | 0.13                   | 0.0109         | 0.0816                      |
| Unclassified; Poorly Characterized; Function unknown                                         | -0.16                        | -0.28                  | -0.04                  | 0.0110         | 0.0816                      |
| Unclassified; Metabolism; Biosynthesis and biodegradation of secondary metabolites           | -0.22                        | -0.38                  | -0.05                  | 0.0111         | 0.0816                      |
| Metabolism; Enzyme Families; Protein kinases                                                 | -0.13                        | -0.23                  | -0.03                  | 0.0113         | 0.0816                      |

|                                                                                                               |       |       |       |        |        |
|---------------------------------------------------------------------------------------------------------------|-------|-------|-------|--------|--------|
| Metabolism; Metabolism of Cofactors and Vitamins; One carbon pool by folate                                   | 0.14  | 0.03  | 0.26  | 0.0114 | 0.0816 |
| Metabolism; Energy Metabolism; Methane metabolism                                                             | 0.06  | 0.01  | 0.11  | 0.0118 | 0.0822 |
| Cellular Processes; Cell Growth and Death; Cell cycle (Caulobacter)                                           | 0.21  | 0.04  | 0.37  | 0.0138 | 0.0929 |
| Genetic Information Processing; Replication and Repair; DNA replication                                       | 0.10  | 0.02  | 0.17  | 0.0145 | 0.0950 |
| Metabolism; Metabolism of Cofactors and Vitamins; Ubiquinone and other terpenoid quinone biosynthesis         | -0.13 | -0.24 | -0.02 | 0.0168 | 0.1066 |
| Human Diseases; Infectious Diseases; Pertussis                                                                | -0.35 | -0.63 | -0.06 | 0.0181 | 0.1119 |
| Metabolism; Carbohydrate Metabolism; Starch and sucrose metabolism                                            | 0.10  | 0.02  | 0.18  | 0.0200 | 0.1187 |
| Metabolism; Xenobiotics Biodegradation and Metabolism; Polycyclic aromatic hydrocarbon degradation            | 0.17  | 0.03  | 0.32  | 0.0204 | 0.1187 |
| Metabolism; Metabolism of Cofactors and Vitamins; Pantothenate and CoA biosynthesis                           | 0.04  | 0.01  | 0.07  | 0.0207 | 0.1187 |
| Unclassified; Cellular Processes and Signaling; Electron transfer carriers                                    | -0.32 | -0.58 | -0.05 | 0.0215 | 0.1199 |
| Cellular Processes; Cell Motility; Bacterial motility proteins                                                | -0.20 | -0.37 | -0.03 | 0.0237 | 0.1293 |
| Metabolism; Amino Acid Metabolism; Amino acid related enzymes                                                 | 0.10  | 0.01  | 0.19  | 0.0251 | 0.1335 |
| Metabolism; Glycan Biosynthesis and Metabolism; Peptidoglycan biosynthesis                                    | 0.17  | 0.02  | 0.31  | 0.0257 | 0.1337 |
| Metabolism; Glycan Biosynthesis and Metabolism; Lipopolysaccharide biosynthesis proteins                      | -0.49 | -0.92 | -0.06 | 0.0263 | 0.1337 |
| Unclassified; Cellular Processes and Signaling; Membrane and intracellular structural molecules               | -0.32 | -0.61 | -0.04 | 0.0272 | 0.1338 |
| Metabolism; Energy Metabolism; Photosynthesis                                                                 | 0.31  | 0.03  | 0.58  | 0.0275 | 0.1338 |
| Metabolism; Energy Metabolism; Photosynthesis proteins                                                        | 0.29  | 0.02  | 0.56  | 0.0325 | 0.1420 |
| Genetic Information Processing; Replication and Repair; Homologous recombination                              | 0.15  | 0.01  | 0.29  | 0.0326 | 0.1420 |
| Genetic Information Processing; Folding; Sorting and Degradation; Protein export                              | 0.20  | 0.02  | 0.38  | 0.0327 | 0.1420 |
| Metabolism; Lipid Metabolism; Sphingolipid metabolism                                                         | 0.32  | 0.03  | 0.61  | 0.0332 | 0.1420 |
| Genetic Information Processing; Translation; Translation factors                                              | 0.20  | 0.02  | 0.38  | 0.0338 | 0.1420 |
| Genetic Information Processing; Replication and Repair; DNA repair and recombination proteins                 | 0.14  | 0.01  | 0.27  | 0.0342 | 0.1420 |
| Metabolism; Metabolism of Terpenoids and Polyketides; Prenyltransferases                                      | 0.07  | 0.01  | 0.13  | 0.0345 | 0.1420 |
| Unclassified; Poorly Characterized; General function prediction only                                          | -0.15 | -0.29 | -0.01 | 0.0345 | 0.1420 |
| Unclassified; Cellular Processes and Signaling; Signal transduction mechanisms                                | -0.12 | -0.23 | -0.01 | 0.0347 | 0.1420 |
| Metabolism; Metabolism of Other Amino Acids; beta Alanine metabolism                                          | -0.15 | -0.29 | -0.01 | 0.0409 | 0.1643 |
| Metabolism; Metabolism of Terpenoids and Polyketides; Limonene and pinene degradation                         | -0.18 | -0.36 | -0.01 | 0.0418 | 0.1652 |
| Metabolism; Metabolism of Terpenoids and Polyketides; Biosynthesis of siderophore group nonribosomal peptides | -0.28 | -0.55 | -0.01 | 0.0437 | 0.1690 |
| Genetic Information Processing; Translation; Ribosome                                                         | 0.26  | 0.01  | 0.52  | 0.0443 | 0.1690 |
| Metabolism; Xenobiotics Biodegradation and Metabolism; Toluene degradation                                    | -0.09 | -0.19 | 0.00  | 0.0457 | 0.1717 |
| Genetic Information Processing; Replication and Repair; Chromosome                                            | 0.03  | 0.00  | 0.06  | 0.0467 | 0.1725 |
| Metabolism; Carbohydrate Metabolism; Glyoxylate and dicarboxylate metabolism                                  | -0.10 | -0.19 | 0.00  | 0.0486 | 0.1768 |

Four studies included are Canada, Haiti, USA (California-Florida), the VDAART trial or USA (California-Massachusetts -Missouri).

Only those with pooled p-values <0.05 are shown. KEGG: Kyoto Encyclopedia of Genes and Genomes; OR: odds ratio; FDR: false discovery rate.

**Supplementary Table 11. Gut bacterial taxa with differential relative abundances from 6 months to 2 years of age between infants with duration of exclusive breastfeeding >2 months vs. ≤2 months from birth.**

| Bacterial taxa |                    |                     |                        | Estimate<br>(log(OR)) | 95% Lower<br>limit | 95% Upper<br>limit | p-value | FDR adjusted<br>p-value |
|----------------|--------------------|---------------------|------------------------|-----------------------|--------------------|--------------------|---------|-------------------------|
| Phylum         | Order              | Family              | Genus                  |                       |                    |                    |         |                         |
| Firmicutes     |                    |                     |                        | -0.25                 | -0.37              | -0.12              | 0.0001  | 0.0005                  |
| Actinobacteria |                    |                     |                        | 0.23                  | 0.09               | 0.37               | 0.0015  | 0.0029                  |
| Order          |                    |                     |                        |                       |                    |                    |         |                         |
| Actinobacteria | Coriobacteriales   |                     |                        | -0.25                 | -0.38              | -0.12              | 0.0002  | 0.0007                  |
| Firmicutes     | Lactobacillales    |                     |                        | -0.27                 | -0.41              | -0.13              | 0.0002  | 0.0007                  |
| Actinobacteria | Bifidobacteriales  |                     |                        | 0.25                  | 0.11               | 0.39               | 0.0004  | 0.0009                  |
| Firmicutes     | Erysipelotrichales |                     |                        | -0.15                 | -0.30              | 0.00               | 0.0448  | 0.0784                  |
| Family         |                    |                     |                        |                       |                    |                    |         |                         |
| Firmicutes     | Lactobacillales    | Lactobacillaceae    |                        | -0.31                 | -0.46              | -0.16              | <0.0001 | 0.0006                  |
| Actinobacteria | Coriobacteriales   | Coriobacteriaceae   |                        | -0.25                 | -0.38              | -0.12              | 0.0002  | 0.0001                  |
| Actinobacteria | Bifidobacteriales  | Bifidobacteriaceae  |                        | 0.25                  | 0.11               | 0.39               | 0.0004  | 0.0017                  |
| Bacteroidetes  | Bacteroidales      | Prevotellaceae      |                        | -0.27                 | -0.43              | -0.11              | 0.0008  | 0.0027                  |
| Firmicutes     | Clostridiales      | Clostridiaceae      |                        | -0.22                 | -0.37              | -0.06              | 0.0067  | 0.0174                  |
| Firmicutes     | Lactobacillales    | Enterococcaceae     |                        | 0.19                  | 0.03               | 0.35               | 0.0193  | 0.0419                  |
| Firmicutes     | Erysipelotrichales | Erysipelotrichaceae |                        | -0.15                 | -0.30              | 0.00               | 0.0448  | 0.0789                  |
| Firmicutes     | Clostridiales      | Lachnospiraceae     |                        | -0.14                 | -0.28              | 0.00               | 0.0486  | 0.0789                  |
| Genus          |                    |                     |                        |                       |                    |                    |         |                         |
| Firmicutes     | Lactobacillales    | Lactobacillaceae    | <i>Lactobacillus</i>   | -0.33                 | -0.48              | -0.18              | <0.0001 | 0.0003                  |
| Firmicutes     | Clostridiales      | Unassigned          | <i>Unassigned</i>      | -0.34                 | -0.49              | -0.18              | <0.0001 | 0.0003                  |
| Actinobacteria | Bifidobacteriales  | Bifidobacteriaceae  | <i>Bifidobacterium</i> | 0.25                  | 0.11               | 0.39               | 0.0004  | 0.0027                  |
| Firmicutes     | Clostridiales      | Lachnospiraceae     | <i>.ruminococcus.</i>  | -0.25                 | -0.40              | -0.11              | 0.0007  | 0.0035                  |
| Bacteroidetes  | Bacteroidales      | Prevotellaceae      | <i>Prevotella</i>      | -0.27                 | -0.43              | -0.11              | 0.0008  | 0.0035                  |
| Actinobacteria | Coriobacteriales   | Coriobacteriaceae   | <i>Unassigned</i>      | -0.22                 | -0.36              | -0.08              | 0.0027  | 0.0093                  |
| Firmicutes     | Clostridiales      | Clostridiaceae      | <i>Unassigned</i>      | -0.24                 | -0.41              | -0.08              | 0.0043  | 0.0129                  |
| Firmicutes     | Clostridiales      | Lachnospiraceae     | <i>Blautia</i>         | -0.22                 | -0.37              | -0.06              | 0.0058  | 0.0152                  |
| Actinobacteria | Coriobacteriales   | Coriobacteriaceae   | <i>Collinsella</i>     | -0.17                 | -0.30              | -0.04              | 0.0125  | 0.0292                  |
| Firmicutes     | Erysipelotrichales | Erysipelotrichaceae | <i>Catenibacterium</i> | -0.23                 | -0.42              | -0.04              | 0.0165  | 0.0346                  |
| Firmicutes     | Clostridiales      | Lachnospiraceae     | <i>Unassigned</i>      | -0.16                 | -0.30              | -0.02              | 0.0259  | 0.0494                  |
| Firmicutes     | Lactobacillales    | Enterococcaceae     | <i>Enterococcus</i>    | 0.18                  | 0.02               | 0.34               | 0.0310  | 0.0543                  |

Data from Bangladesh study only.

Only those with p-values <0.05 are shown. OR: odds ratio; FDR: false discovery rate.

**Supplementary Table 12. Breastfeeding is associated with reduced differences in gut bacterial taxa relative abundances between those who had vs. did not have diarrhea at the time of stool sample collection in infants from 6 months to 2 years of age.**

|                                                                                             | Estimate (log(OR)) | 95% Lower limit | 95% Upper limit | p-value | FDR adjusted p-value |
|---------------------------------------------------------------------------------------------|--------------------|-----------------|-----------------|---------|----------------------|
| <b>Stratified by duration of exclusive breastfeeding (EBF)</b>                              |                    |                 |                 |         |                      |
| <i>In infants with duration of EBF &lt;=2 months (diarrhea vs. no diarrhea comparison)</i>  |                    |                 |                 |         |                      |
| Bifidobacteriaceae                                                                          | -0.77              | -1.16           | -0.38           | 0.0001  | 0.0017               |
| Coriobacteriaceae                                                                           | -0.69              | -1.08           | -0.31           | 0.0005  | 0.0031               |
| Streptococcaceae                                                                            | 0.53               | 0.17            | 0.89            | 0.0044  | 0.0191               |
| <i>In infants with duration of EBF &gt;2 months (diarrhea vs. no diarrhea comparison)</i>   |                    |                 |                 |         |                      |
| No bacterial family with change in relative abundance p-value <0.05                         |                    |                 |                 |         |                      |
| <b>Stratified by breastfeeding status at the time of diarrhea</b>                           |                    |                 |                 |         |                      |
| <i>In infants without breastfeeding when diarrhea (diarrhea vs. no diarrhea comparison)</i> |                    |                 |                 |         |                      |
| Streptococcaceae                                                                            | 2.09               | 0.87            | 3.32            | 0.0018  | 0.0228               |
| Bifidobacteriaceae                                                                          | -1.84              | -3.34           | -0.34           | 0.0208  | 0.1351               |
| <i>In infants with breastfeeding when diarrhea (diarrhea vs. no diarrhea comparison)</i>    |                    |                 |                 |         |                      |
| Coriobacteriaceae                                                                           | -0.34              | -0.63           | -0.06           | 0.0189  | 0.2458               |
| Bifidobacteriaceae                                                                          | -0.25              | -0.55           | 0.05            | 0.0981  | 0.4727               |

Data from Bangladesh study only.

Only taxa with p-value <0.05 are shown. OR: odds ratio; FDR: false discovery rate.

## Supplementary Table 13. Additional summary of included studies.

| Data origin (study population), reference                                             | Results about the effects of breastfeeding on infant gut microbiome and statistical methods used in published paper                                                                                                                                                                                                                                                                                                         | Starting files used and data processing done in this project                                                                                                                                                                                                                                                                     | Note                                                                                                                                                                                  |
|---------------------------------------------------------------------------------------|-----------------------------------------------------------------------------------------------------------------------------------------------------------------------------------------------------------------------------------------------------------------------------------------------------------------------------------------------------------------------------------------------------------------------------|----------------------------------------------------------------------------------------------------------------------------------------------------------------------------------------------------------------------------------------------------------------------------------------------------------------------------------|---------------------------------------------------------------------------------------------------------------------------------------------------------------------------------------|
| Bangladesh (Subramanian et al. 2014) <sup>34</sup> #€*                                | No analysis on breastfeeding status                                                                                                                                                                                                                                                                                                                                                                                         | Assembled 16S reads used for OTU picking (.fna file), mapping and meta-data files.<br><br>- Open OTU picking with UCLUST with 97% similarity using the Greengenes database (version 13.8)                                                                                                                                        | Total number of all samples from birth to 2 years of age =996 ( EBF=152, non-EBF=794, non-BF=50)                                                                                      |
| Canada (Azad et al. 2015) <sup>30</sup> \$§                                           | - diversity (Chao1, Shannon): trend test significant (EBF<Non-EBF<non-BF)<br><br>- composition: (Kruskal–Wallis test):<br><br>EBF>Non-EBF>non-BF: Proteobacteria, Actinobacteria;<br><br>EBF<Non-EBF<non-BF: Bacteroidetes, Firmicutes (Clostridiales)                                                                                                                                                                      | - Bacterial taxa relative abundance summary tables from phylum to genus levels; alpha diversity summary tables; predicted KEGG pathway abundance summary tables; metadata file. (Prior sequence data processing was done by the collaborative group using similar procedures as of this project).                                | The effect of infant age on breastfeeding status and gut microbiome was not accounted in the analysis (relatively accounted by study design (stool sample collection at similar age)) |
| Haiti (Bender et al. 2016) <sup>3</sup> §€                                            | PERMANNOVA test: no significant difference between EBF and non-EBF                                                                                                                                                                                                                                                                                                                                                          | - Assembled 16S reads used for OTU picking (.fna file), mapping and meta-data files.<br><br>- Open reference OTU picking with UCLUST with 97% similarity using the Greengenes database (version 13.8)                                                                                                                            | The effect of infant age on breastfeeding status and gut microbiome was not accounted in the analysis (relatively accounted by study design (stool sample collection at similar age)) |
| South Africa (Wood et al. 2018) <sup>27</sup>                                         | - Alpha diversity (Chao1): non-EBF >EBF (Wilcoxon's test)<br><br>- Bacterial composition (DESeq2 package (negative binomial generalized linear models));<br><br>- EBF > non-EBF: <i>S. lactarius</i> , <i>Actinomyces</i> , <i>Atopobium</i><br><br>- non-EBF > EBF: <i>Streptococcus. luteciae</i> , Bacteroides (OTU)                                                                                                     | - Assembled raw FASTQ file.<br><br>- Converting FASTQ file to FASTA and QUAL files. Open reference OTU picking with UCLUST with 97% similarity using the Greengenes database (version 13.8)                                                                                                                                      | The effect of infant age on breastfeeding status and gut microbiome was accounted by study design (stool sample collection at the same age)                                           |
| USA (California and Florida) (Pannaraj et al. 2017) <sup>5</sup> #§€                  | Bacterial composition (Random Forest model):<br><br>- EBF > non-EBF: Proteobacteria, Bacteroides.<br><br>- non-EBF >EBF: Firmicutes, Actinobacteria                                                                                                                                                                                                                                                                         | - Assembled 16S reads used for OTU picking (.fna file), mapping and meta-data files.<br><br>- Open reference OTU picking with UCLUST with 97% similarity using the Greengenes database (version 13.8)                                                                                                                            | The effect of infant age on breastfeeding status and gut microbiome was not accounted in the analysis                                                                                 |
| USA (Massachusetts, Missouri, and California) (Sordillo et al. 2017) <sup>18</sup> #§ | No direct comparison between EBF and non-EBF (EBF and non-EBF was compared with formula fed)                                                                                                                                                                                                                                                                                                                                | - Bacterial taxa relative abundance summary tables from phylum to genus levels; alpha diversity summary tables of different rarefaction depth; predicted KEGG pathway abundance summary tables; metadata file. (Prior sequence data processing was done by the collaborative group using similar procedures as of this project). | The effect of infant age on gut microbiome was accounted in the analysis                                                                                                              |
| USA (North Carolina) (Thompson et al. 2015) <sup>28</sup> #€                          | (non-parametric test ANOSIM (Analysis of Similarities))<br><br>- Trend in species richness and diversity: EBF <non-EBF<Non-BF<br><br>Relative abundance:<br><br>- Bacterial composition: EBF >non- EBF: Actinobacteria (phylum), <i>Bifidobacterium</i> (genus)<br><br>- non- EBF >EBF : Bacteroidetes (phylum), Clostridiales (order), Lachnospiraceae (family),<br><br><i>Blautia</i> and <i>Faecalibacterium</i> (genus) | Assembled 16S reads used for otu-picking (.fna file), mapping file.<br><br>- Open OTU picking with UCLUST with 97% similarity using the Greengenes database (version 13.8)                                                                                                                                                       | The effect of infant age on breastfeeding status and gut microbiome was not accounted (neither in the design nor in analysis).                                                        |

# Studies with three breastfeeding categories (exclusive breastfeeding (EBF), non-exclusive breastfeeding (non-EBF), non-breastfeeding (non-BF)) used for trend tests across three categories.

\$ Studies with available birth mode information used for meta-analysis stratified by birth mode.

€ Studies with available infant sex information used for the analyses adjusting for infant age and sex.

\* This study contains data from 6 months to 2 years of age, which was used for the analysis from 6 months to 2 years of age. Data from this study was downloaded from the authors' website:

[https://gordonlab.wustl.edu/Subramanian\\_6\\_14/Nature\\_2014\\_Processed\\_16S\\_rRNA\\_datasets.html](https://gordonlab.wustl.edu/Subramanian_6_14/Nature_2014_Processed_16S_rRNA_datasets.html). Data from six other studies were obtained directly from the investigators.

## Supplementary Figures

### Supplementary Figure 1. Meta-analysis of included studies without data from either North Carolina, Haiti or VDAART trial study for microbial alpha diversity difference between non-exclusively breastfed vs. exclusively breastfed infants (sensitivity analysis).

**a**

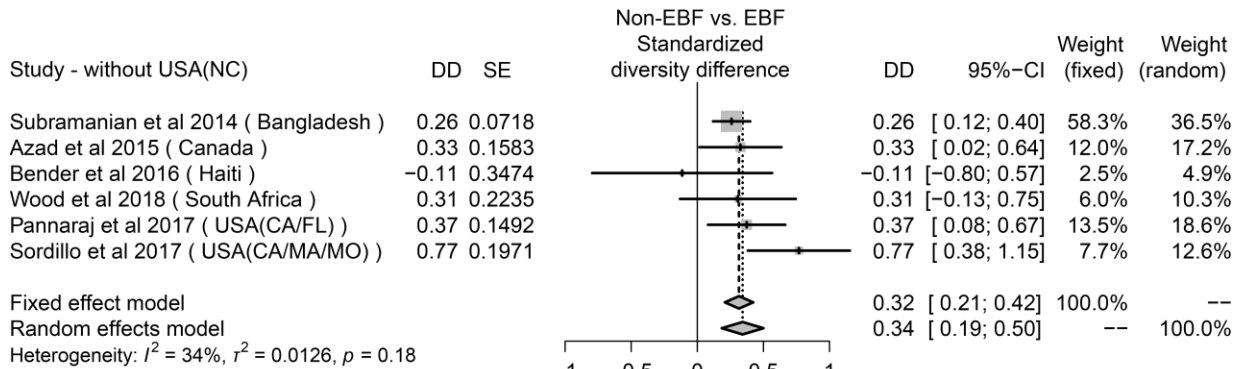

**b**

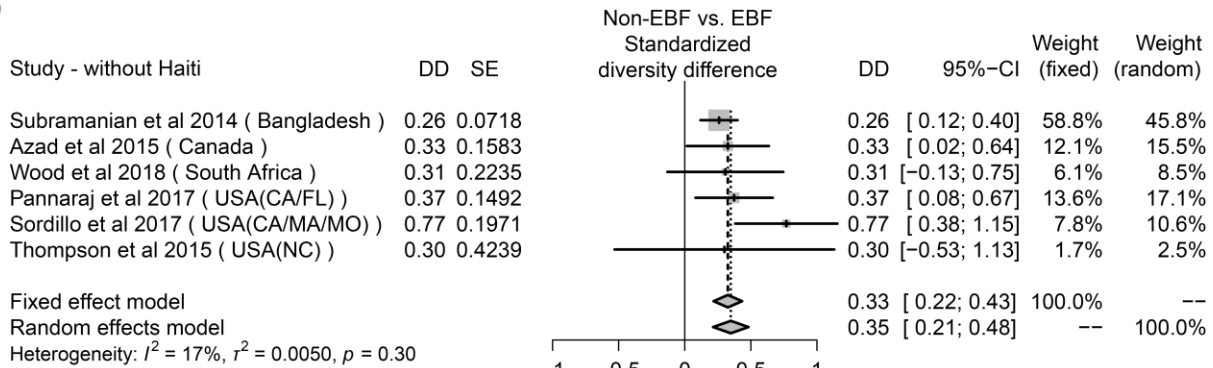

**c**

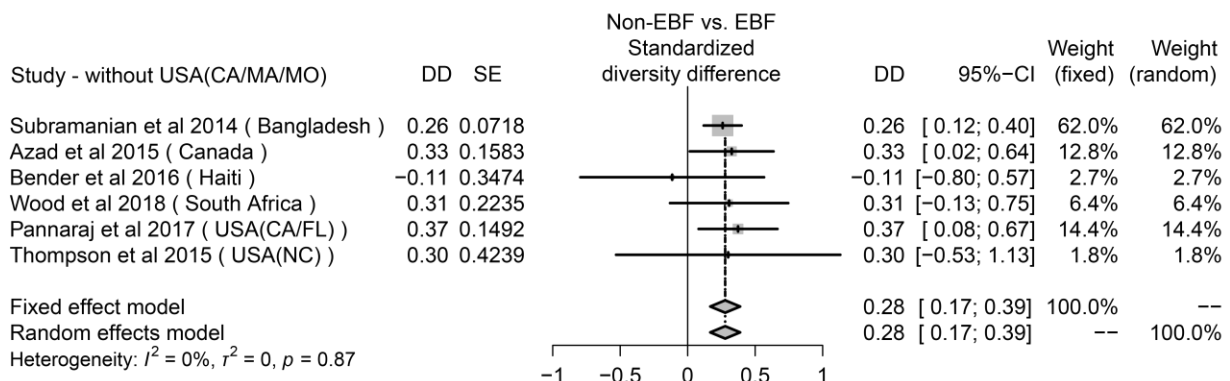

**a:** Meta-analysis without estimates from the USA (North Carolina) study.

**b:** Meta-analysis without estimates from the Haiti study.

**c:** Meta-analysis without estimates from the VDAART trial (USA[California-Massachusetts-Missouri]) study.

The figures show the difference in gut microbial alpha diversity (standardized Shannon index) between non-exclusively breastfed (non-EBF) vs. EBF infants  $\leq 6$  months of age from each study and the pooled effect across studies with 95% confidence intervals. Estimates for diversity difference and corresponding standard errors from each study were from linear mixed effect models (for longitudinal data) or linear models (for non-longitudinal data) and were adjusted for age of infants at sample collection.

EBF: exclusive breastfeeding; non-EBF: non-exclusive breastfeeding; USA: United States of America; CA: California; FL: Florida; MA: Massachusetts; MO: Missouri; NC: North Carolina; DD: Diversity difference; SE: Standard error; VDAART: Vitamin D Antenatal Asthma Reduction Trial.

**Supplementary Figure 2. Meta-analysis stratified by mode of delivery for differences in microbial alpha diversity (Shannon index) between non-exclusively breastfed vs. exclusively breastfed infants  $\leq 6$  months of age.**

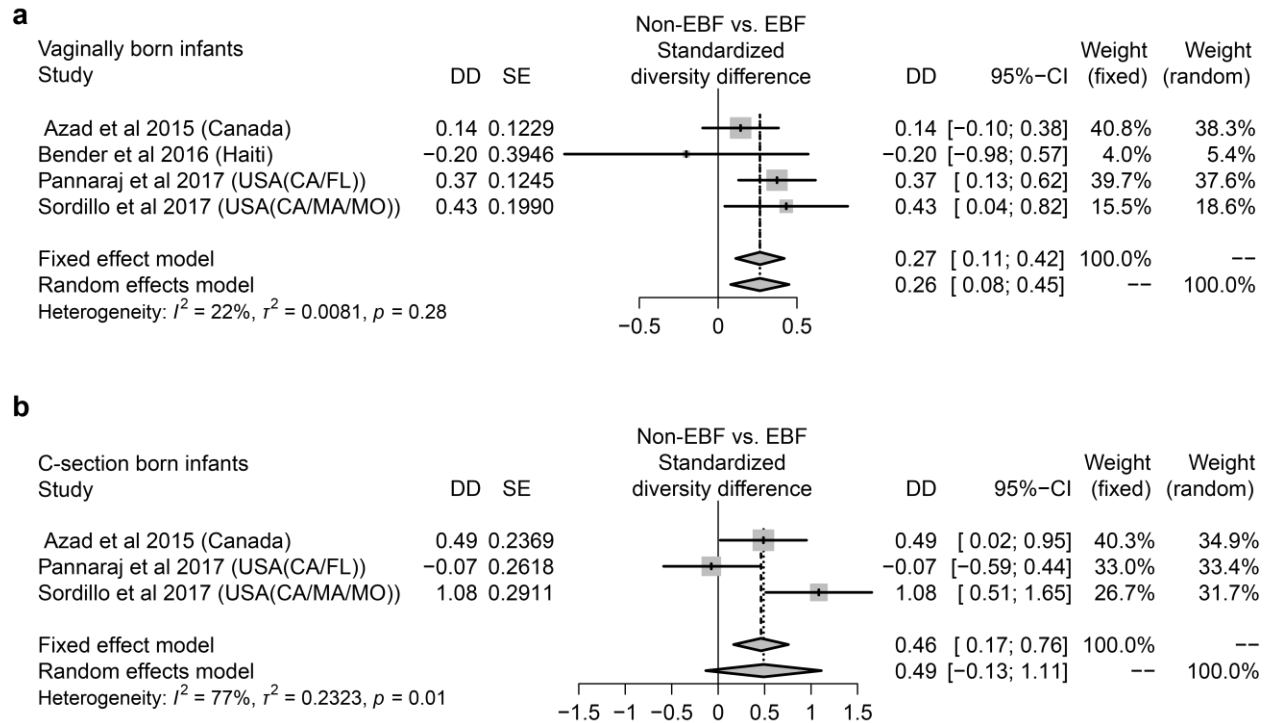

**a.** Meta-analysis of vaginally delivered infants.

**b.** Meta-analysis of cesarean delivered infants.

The figures show the difference in gut alpha diversity (standardized Shannon index) between non-exclusively breastfed (non-EBF) vs. EBF infants  $\leq 6$  months of age from each study and the pooled effect across studies with 95% confidence intervals. Estimates for diversity difference and corresponding standard errors from each study were from linear mixed effect models (for longitudinal data) or linear models (for non-longitudinal data) and were adjusted for age of infants at sample collection.



EBF: exclusive breastfeeding; non-EBF: non-exclusive breastfeeding; USA: United States of America; CA: California; FL: Florida; MA: Massachusetts; MO: Missouri; DD: Diversity difference; SE: Standard error.

**Supplementary Figure 3. Analysis adjusting for infant age vs. analysis adjusting for both infant age and sex for differences in microbial alpha diversity indexes between non-exclusively breastfed vs. exclusively breastfed infants  $\leq 6$  months of age.**

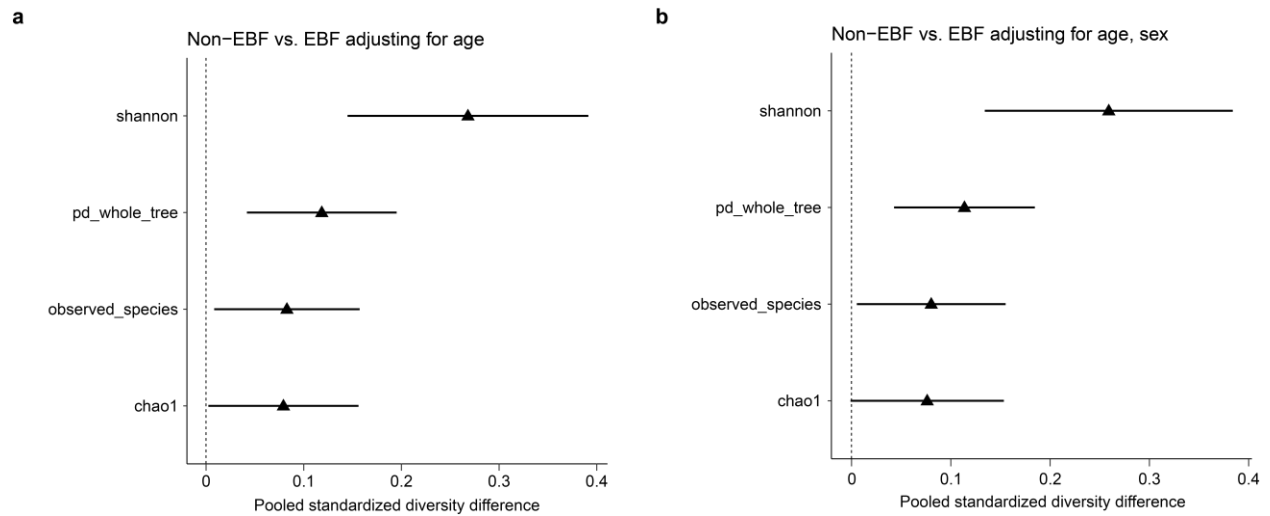

**a.** Non-exclusive breastfeeding (non-EBF) vs. EBF adjusting for infant age.

**b.** Non-EBF vs. EBF adjusting for infant age and sex.

The analysis was done in a subset of four studies with available data on infant sex (Bangladesh, Haiti, USA [California-Florida], USA [North Carolina]).

Estimates for diversity difference and corresponding standard errors from each study were from linear mixed effect models (for longitudinal data) or linear models (for non-longitudinal data) and were adjusted for infant age at sample collection (a) or adjusted for infant age at sample collection and infant sex (b). Pooled estimates of standardized diversity difference and their 95% confidence intervals were from random effect meta-analysis models based on the adjusted estimates and corresponding standard errors of all included studies.

**Supplementary Figure 4. Performance of Random Forest model in prediction of gut microbiota age on the training and test set of Bangladesh data.**

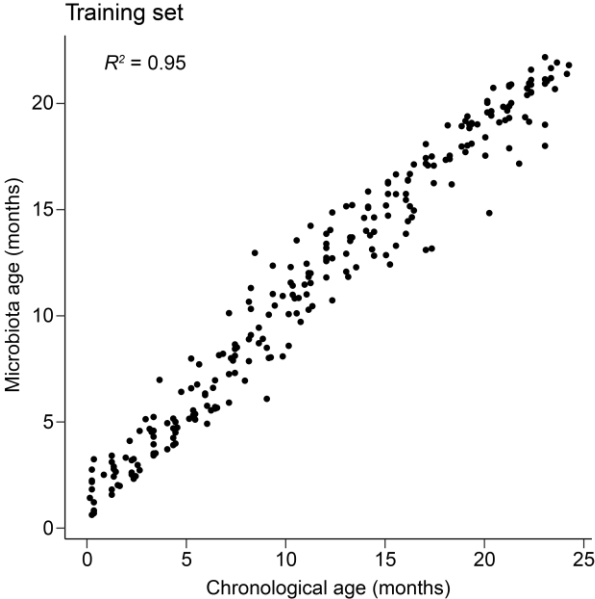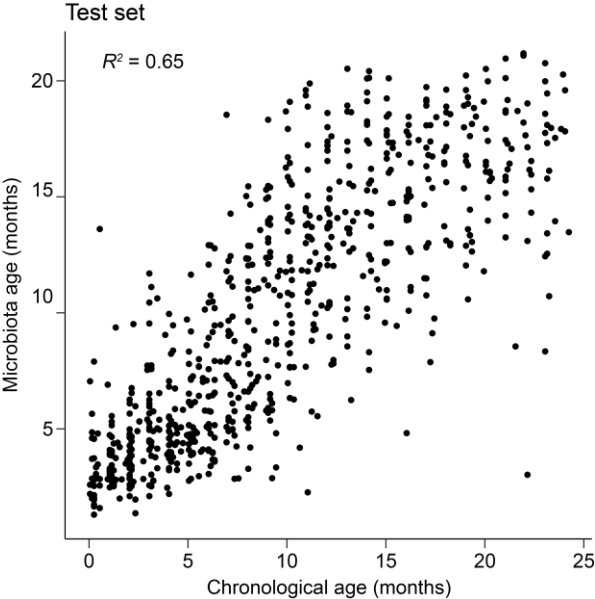

**Supplementary Figure 5. Meta-analysis of included studies without data from either North Carolina, Haiti or VDAART trial study for microbiota age difference between non-exclusively breastfed vs. exclusively breastfed infants (sensitivity analysis).**

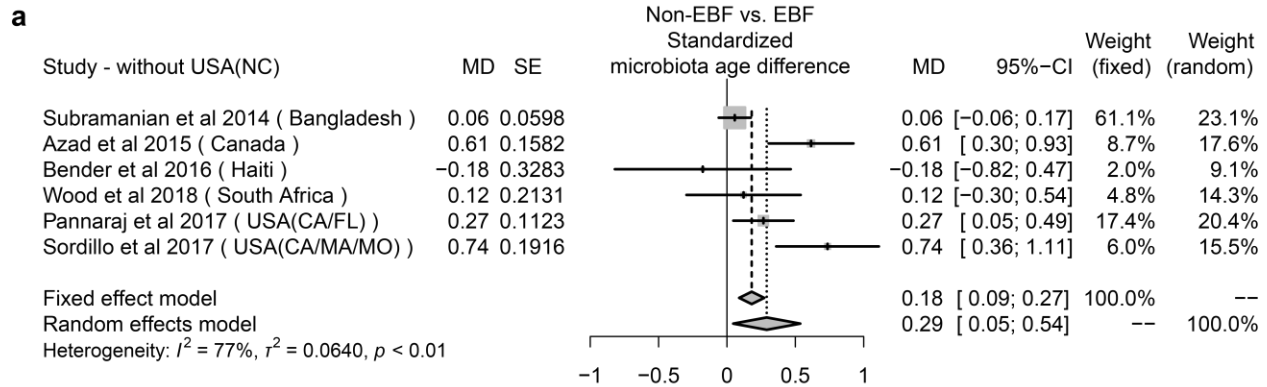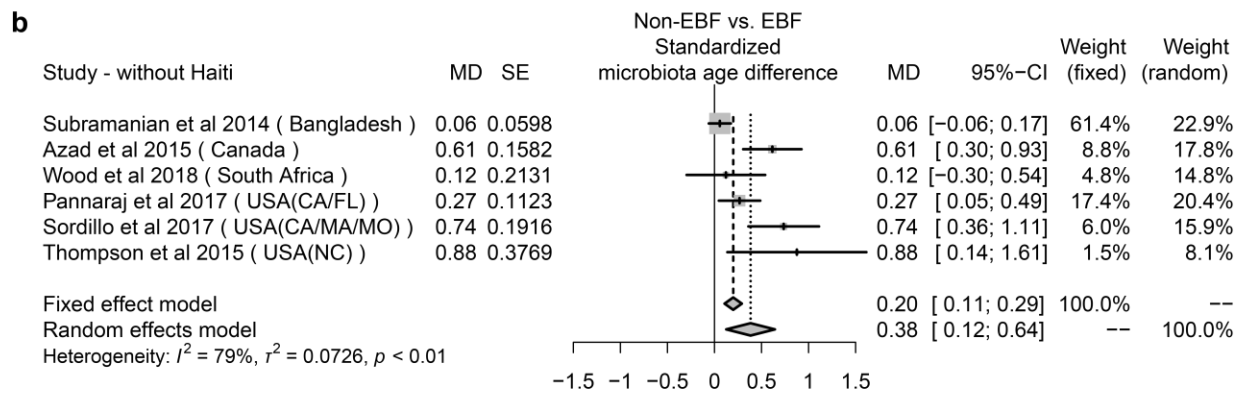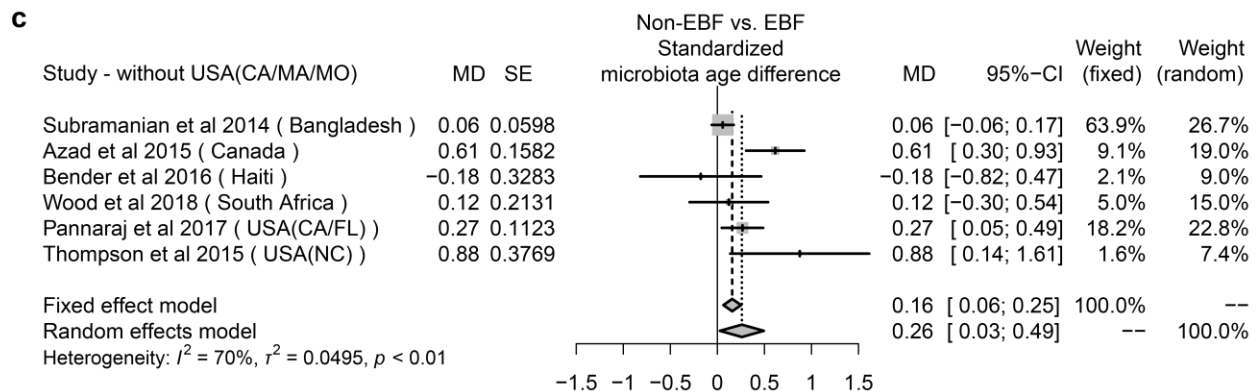

**a:** Meta-analysis without estimates from North Carolina study.

**b:** Meta-analysis without estimates from Haiti study.

**c:** Meta-analysis without estimates from VDAART trial (USA[California-Massachusetts-Missouri]) study.

The figures show the difference in gut (standardized) microbiota age between non-exclusively breastfed (non-EBF) vs. EBF infants  $\leq 6$  months of age from each study and the pooled effect across studies with 95% confidence intervals. Estimates for microbiota age difference and corresponding standard error from each study were from linear mixed effect models (for longitudinal data) or linear models (for non-longitudinal data) and were adjusted for age of infants at sample collection.

EBF: exclusive breastfeeding; non-EBF: non-exclusive breastfeeding; USA: United States of America; CA: California; FL: Florida; MA: Massachusetts; MO: Missouri; NC: North Carolina; MD: Microbiota age difference; SE: Standard error; VDAART: Vitamin D Antenatal Asthma Reduction Trial.

**Supplementary Figure 6. Meta-analysis stratified by mode of delivery for differences in microbiota age between non-exclusively breastfed vs. exclusively breastfed infants  $\leq 6$  months of age.**

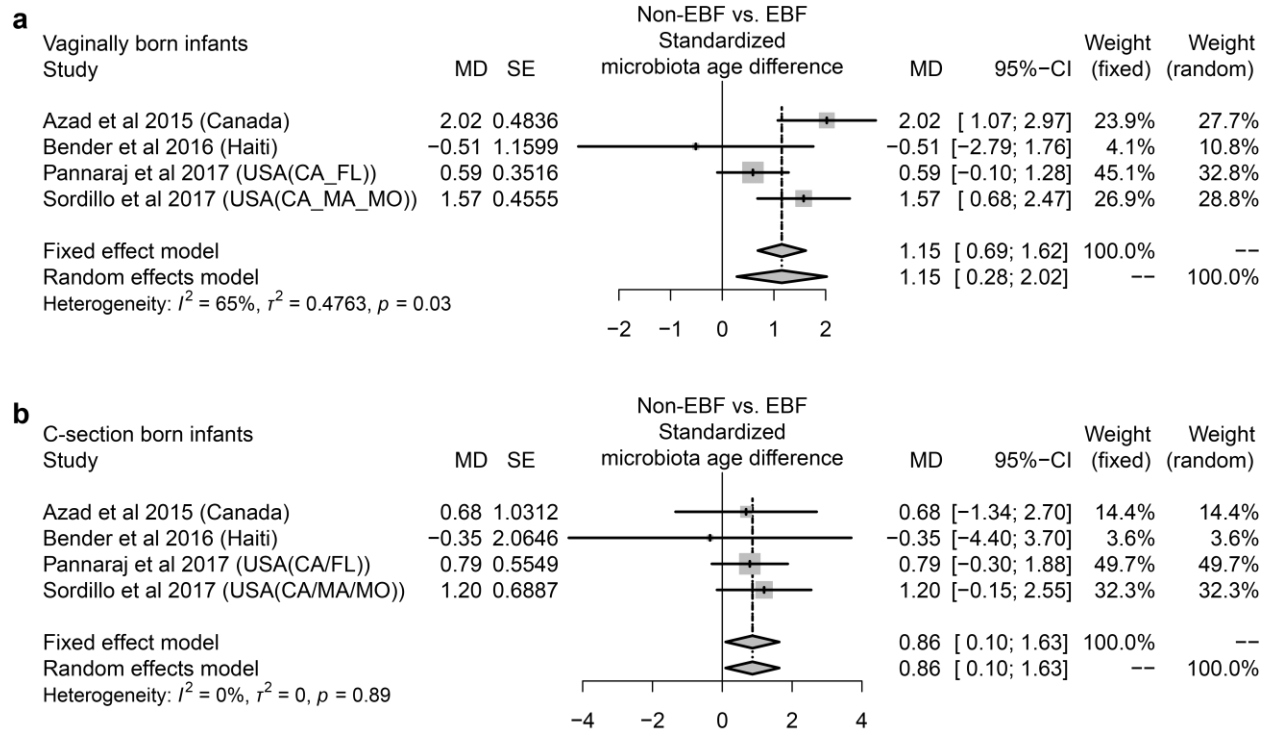

**a.** Meta-analysis of vaginally born infants only.

**b.** Meta-analysis of C-section born infants only.

The figures show the difference in gut microbiota age between non-exclusively breastfed (non-EBF) vs. EBF infants  $\leq 6$  months of age from each study and the pooled effect (meta-analysis) with 95% confidence intervals across four studies with available mode of delivery information. Estimates for microbiota age difference and corresponding standard error from each study were from linear mixed effect models (for longitudinal data) or linear models (for non-longitudinal data) and were adjusted for age of infants at sample collection.

EBF: exclusive breastfeeding; non-EBF: non-exclusive breastfeeding; USA: United States of America; CA: California; FL: Florida; MA: Massachusetts; MO: Missouri; MD: Microbiota age difference; SE: Standard error.

**Supplementary Figure 7. Analysis adjusting for infant age vs. analysis adjusting for both infant age and sex for differences in microbiota age between non-exclusively breastfed vs. exclusively breastfed infants  $\leq 6$  months of age.**

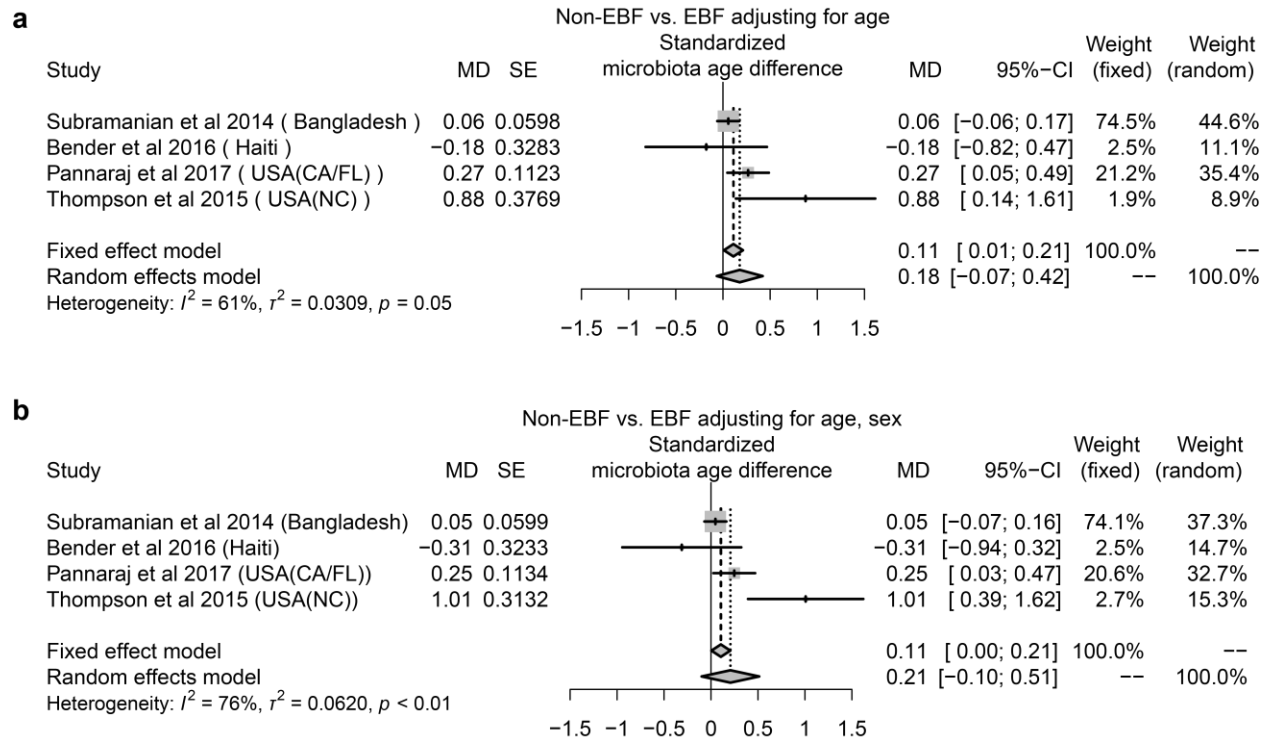

**a.** Non-exclusive breastfeeding (non-EBF) vs. EBF adjusting for infant age.

**b.** Non-EBF vs. EBF adjusting for infant age and sex.

The figures show the difference in gut microbiota age between non-exclusively breastfed (non-EBF) vs. EBF infants  $\leq 6$  months of age from each study and the pooled effect (meta-analysis) with 95% confidence intervals across four studies with available infant sex information.

Estimates for microbiota age difference and corresponding standard error from each study were from linear mixed effect models (for longitudinal data) or linear models (for non-longitudinal data) and were adjusted for infant age at sample collection (a) or adjusted for both infant age at sample collection and infant sex (b).



EBF: exclusive breastfeeding; non-EBF: non-exclusive breastfeeding; USA: United States of America; CA: California; FL: Florida; NC: North Carolina; MD: Microbiota age difference; SE: Standard error.

**Supplementary Figure 8. Meta-analysis of seven included studies for the effects of non-exclusive vs. exclusive breastfeeding on relative abundance of gut bacterial taxa at order level in infants  $\leq 6$  months.**

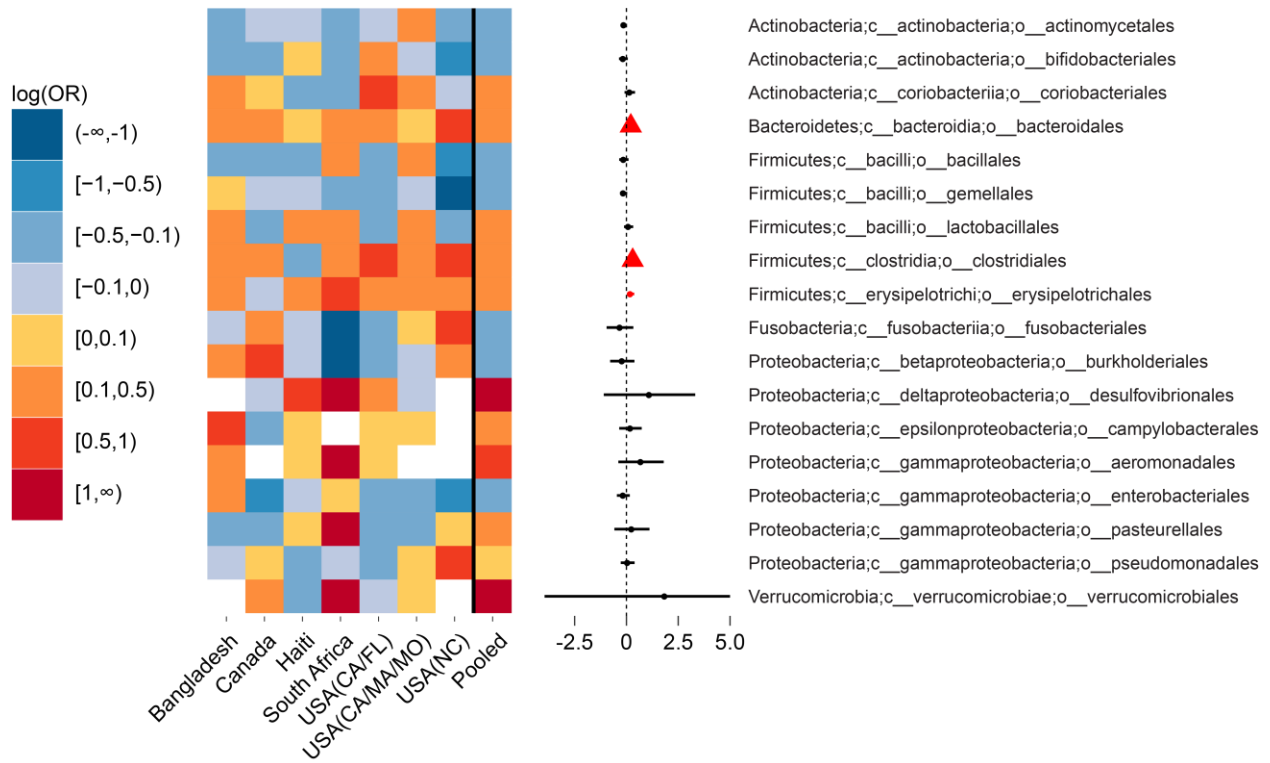

Heatmap of log(odds ratio) (log(OR)) of relative abundance of all gut bacterial taxa at order level between non-exclusively breastfed (non-EBF) vs. exclusively breastfed (EBF) infants for each study and forest plot of pooled estimates of all studies with 95% confidence intervals (95% CI). All log(OR) estimates of each order from each study were from Generalized Additive Models for Location Scale and Shape (GAMLSS) with beta zero inflated family (BEZI) and were adjusted for age of infants at sample collection. Pooled log(OR) estimates and 95% CI (forest plot) were from random effect meta-analysis models based on the adjusted log(OR) estimates and corresponding standard errors of all included studies.

Pooled log(OR) estimates with pooled p-values < 0.05 are in red and those with false discovery rate (FDR) adjusted pooled p-values < 0.1 are shown as triangles.

Missing (unavailable) values are in white.

USA: United States of America; CA: California; FL: Florida; MA: Massachusetts; MO:

Missouri; NC: North Carolina.

**Supplementary Figure 9. Meta-analysis of seven included studies for the effects of non-exclusive vs. exclusive breastfeeding on relative abundance of gut bacterial taxa at genus level in infants  $\leq 6$  months.**

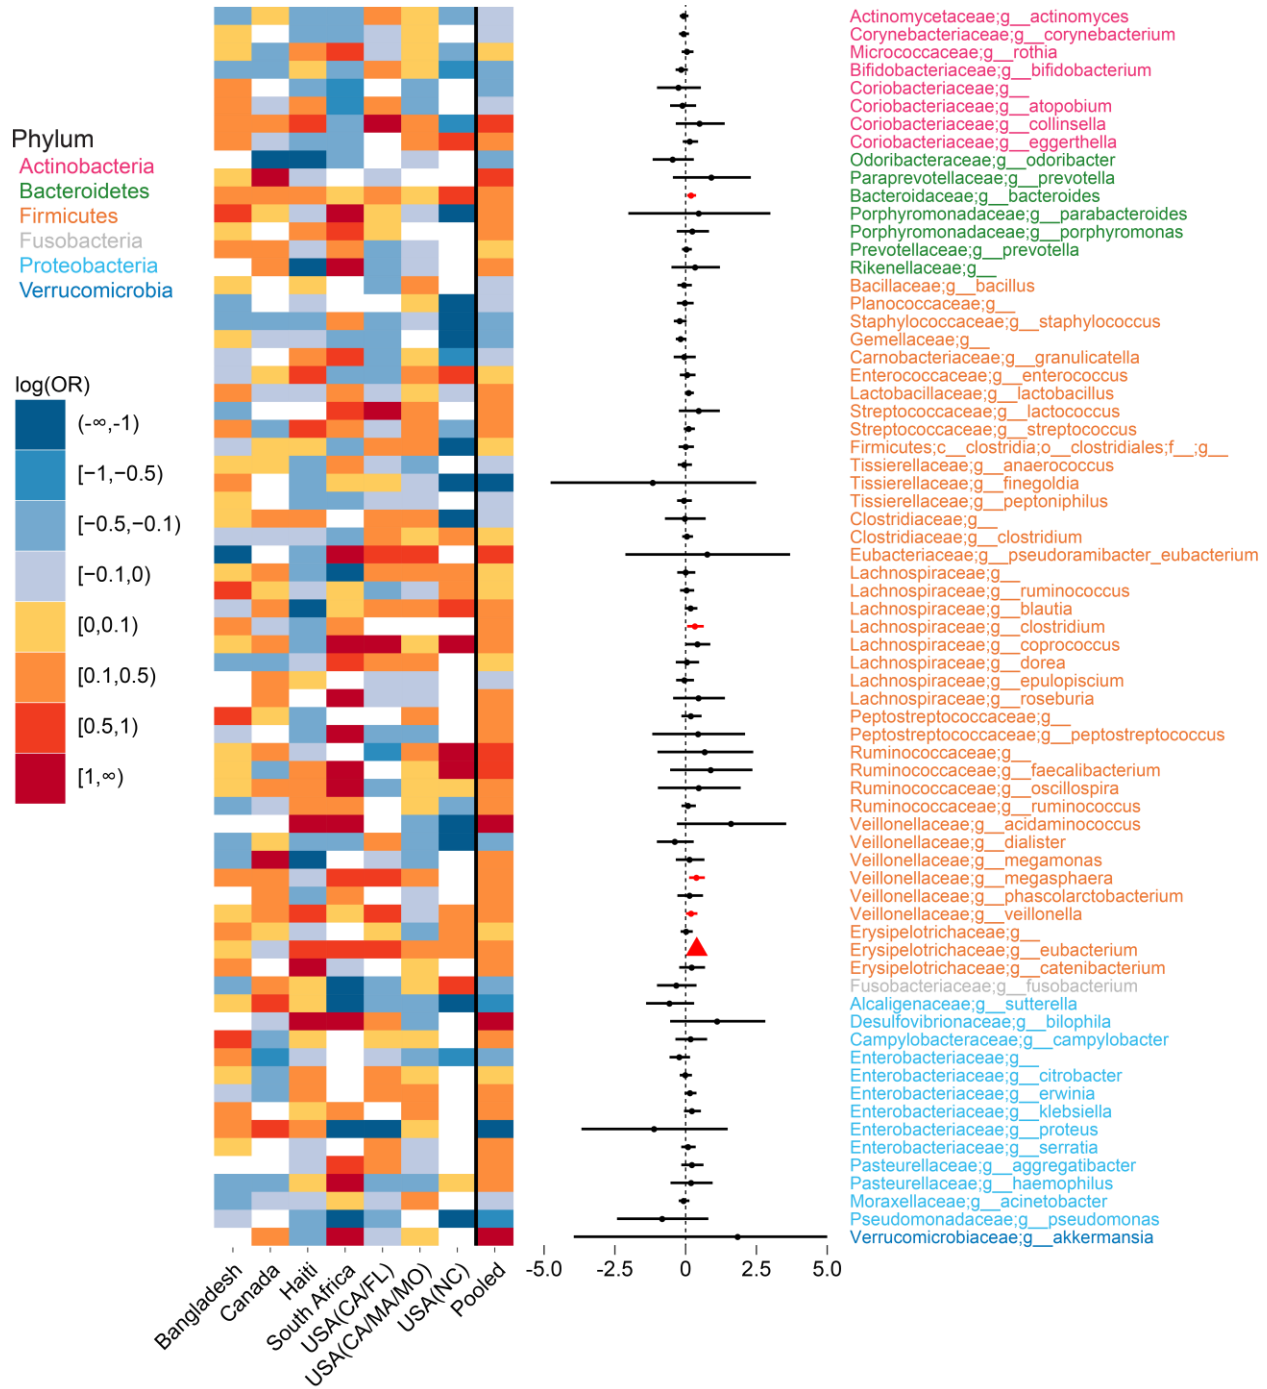

Heatmap of log(odds ratio) ( $\log(\text{OR})$ ) of relative abundance of all gut bacterial taxa at genus level between non-exclusively breastfed (non-EBF) vs. exclusively breastfed (EBF) infants for each study and forest plot of pooled estimates of all studies with 95% confidence intervals (95% CI). All  $\log(\text{OR})$  estimates of each genus from each study were from Generalized Additive Models for Location Scale and Shape (GAMLSS) with beta zero inflated family (BEZI) and were adjusted for age of infants at sample collection. Pooled  $\log(\text{OR})$  estimates and 95% CI (forest plot) were from random effect meta-analysis models based on the adjusted  $\log(\text{OR})$  estimates and corresponding standard errors of all included studies.

Pooled  $\log(\text{OR})$  estimates with pooled p-values  $<0.05$  are in red and those with false discovery rate (FDR) adjusted pooled p-values  $<0.1$  are shown as triangles.

Missing (unavailable) values are in white.

USA: United States of America; CA: California; FL: Florida; MA: Massachusetts; MO: Missouri; NC: North Carolina.

**Supplementary Figure 10. Meta-analysis stratified by mode of delivery for the effects of non-exclusive vs. exclusive breastfeeding on relative abundance of gut bacterial taxa at phylum level in infants  $\leq 6$  months.**

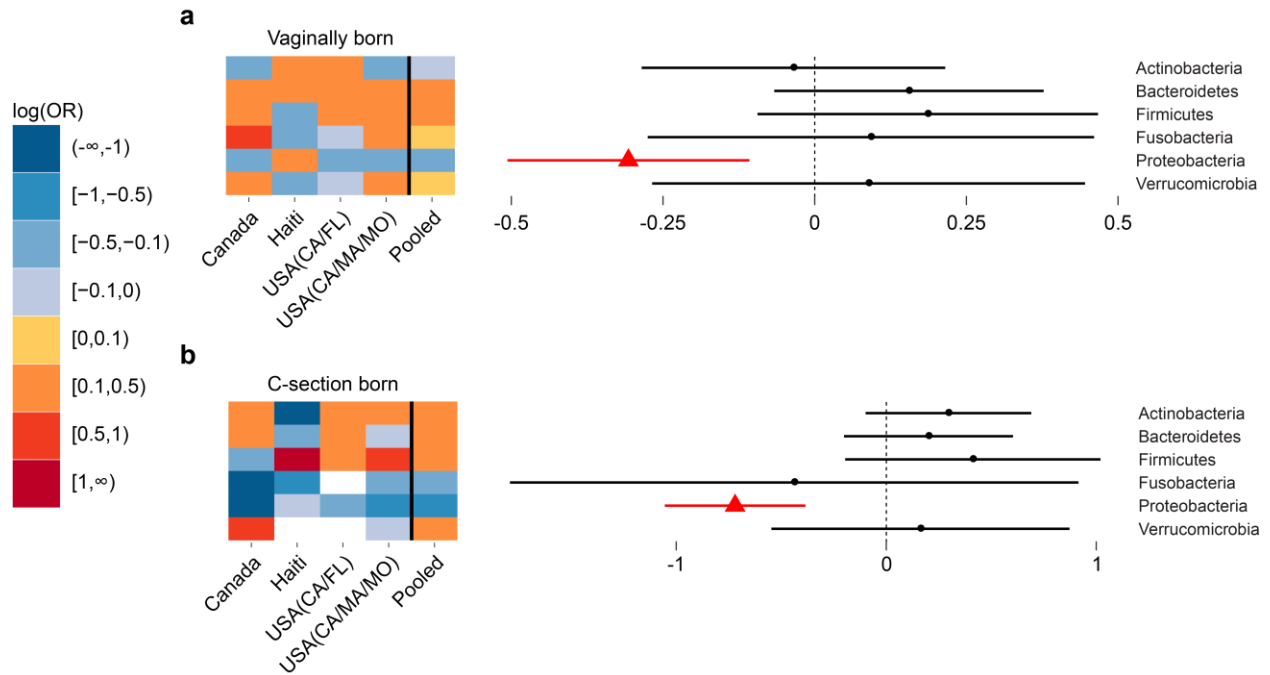

**a.** Meta-analysis of vaginally born infants only.

**b.** Meta-analysis of C-section born infants only.

The figures show heatmap of log(odds ratio) (log(OR)) of relative abundances of all gut bacterial phyla between non-exclusively breastfed (non-EBF) vs. exclusively breastfed (EBF) infants for each study and forest plot of pooled estimates across four studies (with available mode of delivery information) and 95% confidence intervals (95% CI).

All log(OR) estimates of each bacterial phylum from each study were from Generalized Additive Models for Location Scale and Shape (GAMLSS) with beta zero inflated family (BEZI) and were adjusted for age of infants at sample collection. Pooled log(OR) estimates and 95% CI (forest plot) were from random effect meta-analysis models based on the adjusted log(OR) estimates and corresponding standard errors of all included studies.

Pooled log(OR) estimates with pooled p-values < 0.05 are in red and those with false discovery rate (FDR) adjusted pooled p-values < 0.1 are shown as triangles.

Missing (unavailable) values are in white.

USA: United States of America; CA: California; FL: Florida; MA: Massachusetts; MO: Missouri.

**Supplementary Figure 11. Meta-analysis stratified on vaginally delivered infants for the effects of non-exclusive vs. exclusive breastfeeding on relative abundance of gut bacterial taxa at family level in infants  $\leq 6$  months.**

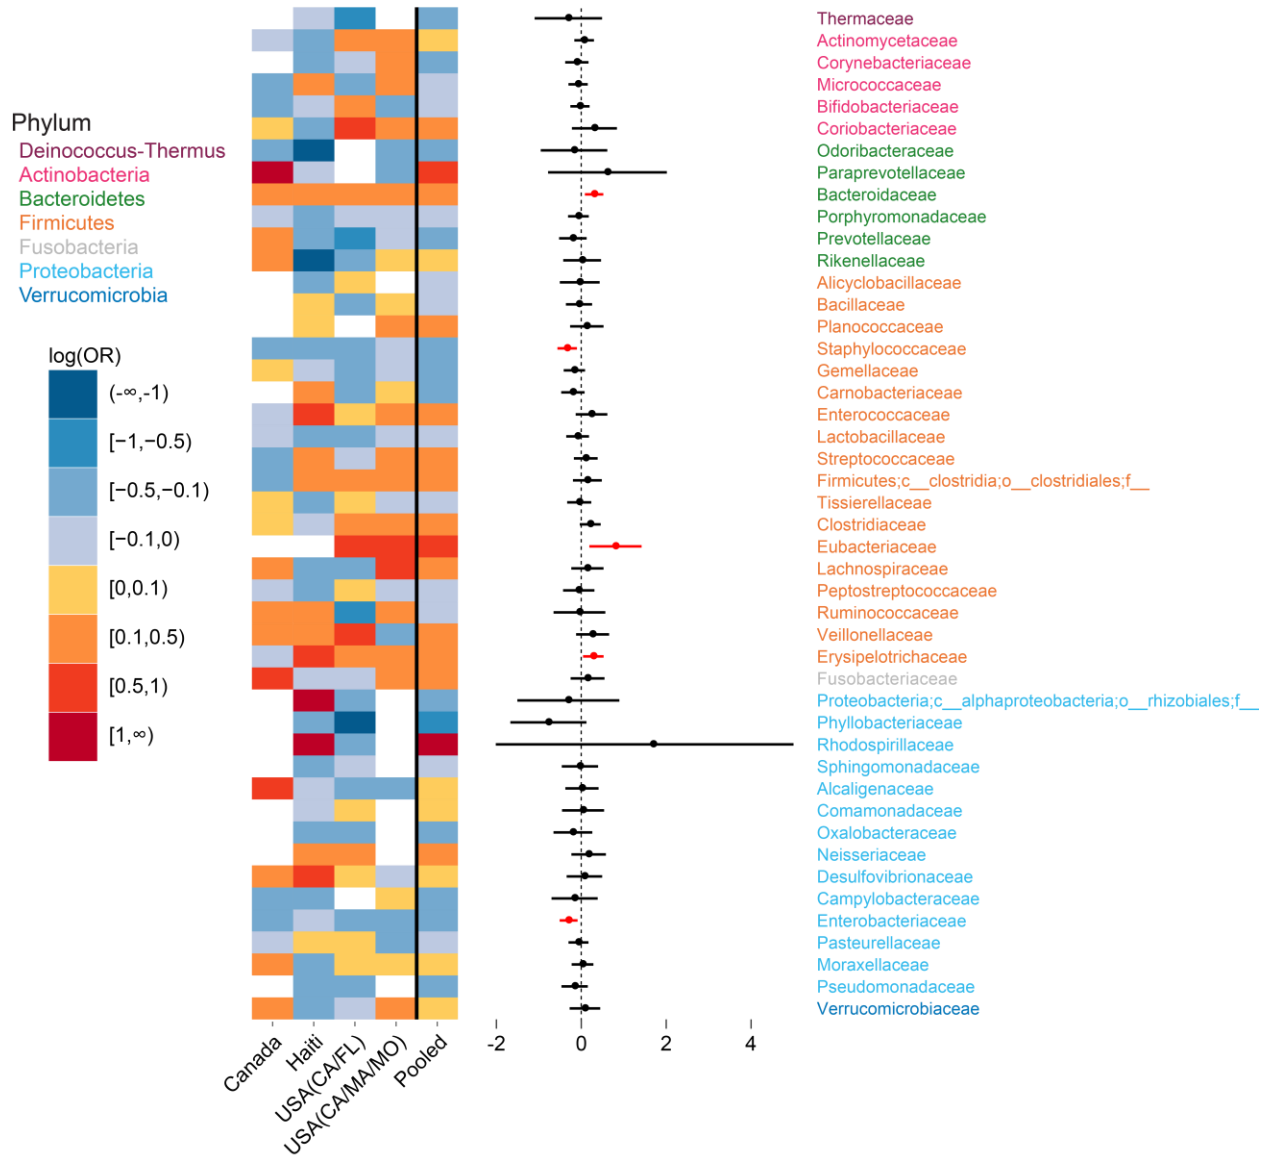

Heatmap of log(odds ratio) (log(OR)) of relative abundances of all gut bacterial families between non-exclusively breastfed (non-EBF) vs. exclusively breastfed (EBF) infants for each study and forest plot of pooled estimates across four studies (with available mode of delivery information) and 95% confidence intervals (95% CI).



All log(OR) estimates of each bacterial taxa from each study were from Generalized Additive Models for Location Scale and Shape (GAMLSS) with beta zero inflated family (BEZI) and were adjusted for age of infants at sample collection. Pooled log(OR) estimates and 95% CI (forest plot) were from random effect meta-analysis models based on the adjusted log(OR) estimates and corresponding standard errors of all included studies.

Pooled log(OR) estimates with pooled p-values <0.05 are in red and those with false discovery rate (FDR) adjusted pooled p-values <0.1 are shown as triangles.

Missing (unavailable) values are in white.

USA: United States of America; CA: California; FL: Florida; MA: Massachusetts; MO: Missouri.

**Supplementary Figure 12. Meta-analysis stratified on C-section delivered infants for the effects of non-exclusive vs. exclusive breastfeeding on relative abundance of gut bacterial taxa at family level in infants  $\leq 6$  months.**

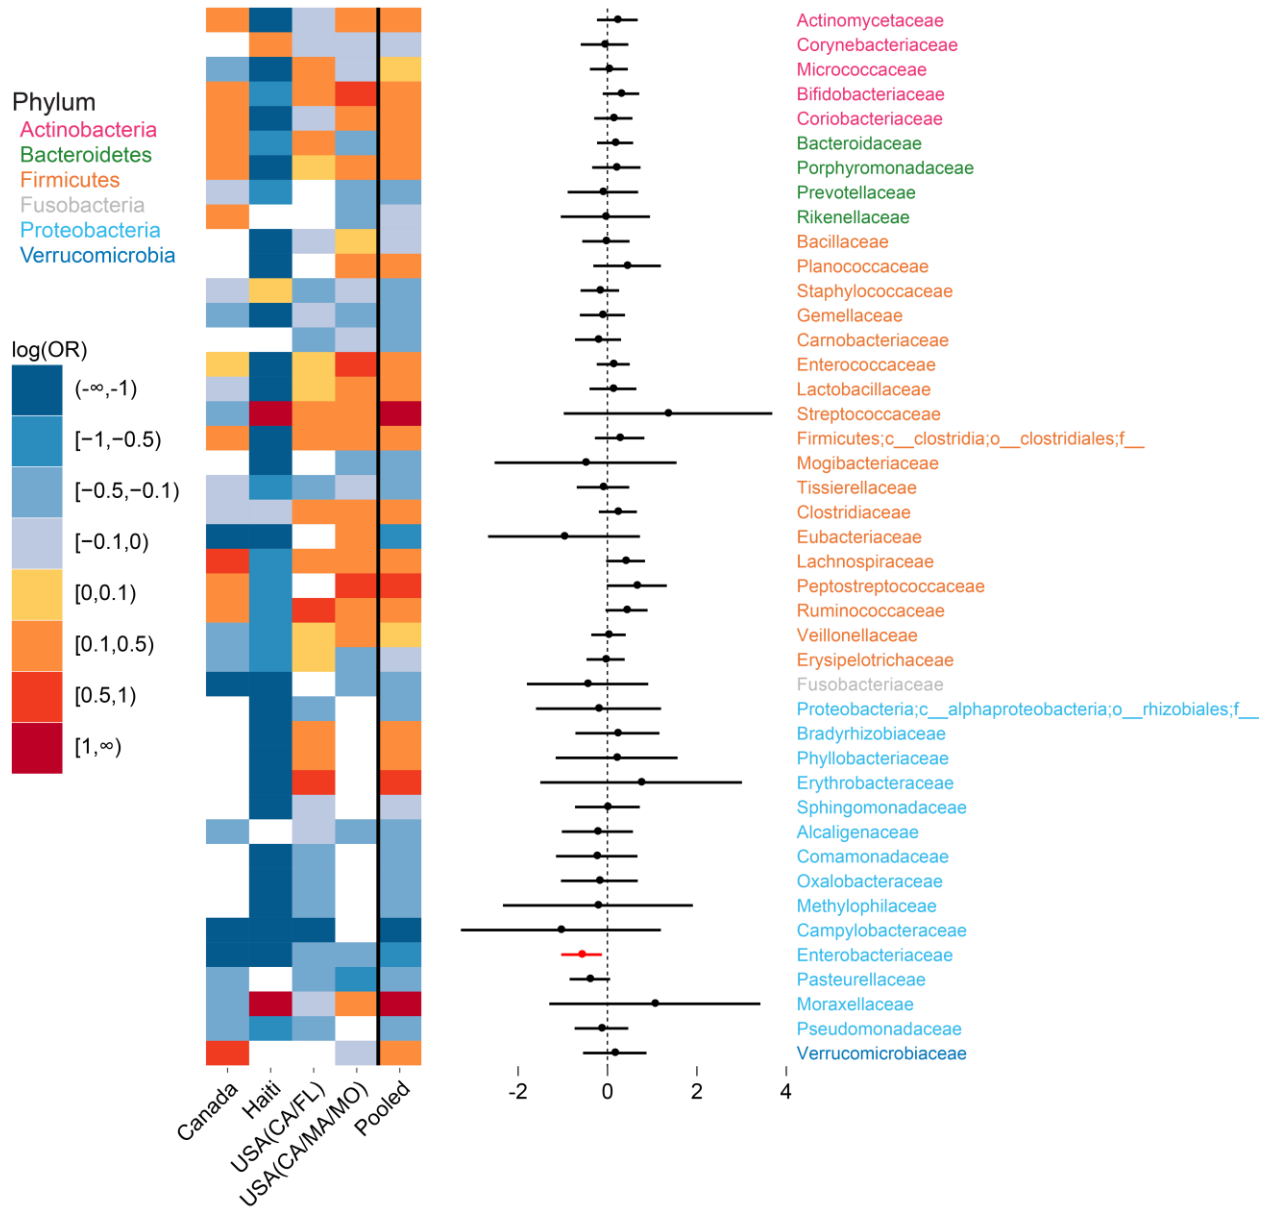

Heatmap of log(odds ratio) (log(OR)) of relative abundances of all gut bacterial families between non-exclusively breastfed (non-EBF) vs. exclusively breastfed (EBF) infants for each study and forest plot of pooled estimates across four studies (with available mode of delivery information) and 95% confidence intervals (95% CI).

All log(OR) estimates of each bacterial taxa from each study were from Generalized Additive Models for Location Scale and Shape (GAMLSS) with beta zero inflated family (BEZI) and were adjusted for age of infants at sample collection. Pooled log(OR) estimates and 95% CI (forest plot) were from random effect meta-analysis models based on the adjusted log(OR) estimates and corresponding standard errors of all included studies.

Pooled log(OR) estimates with pooled p-values <0.05 are in red and those with false discovery rate (FDR) adjusted pooled p-values <0.1 are shown as triangles.

Missing (unavailable) values are in white.

USA: United States of America; CA: California; FL: Florida; MA: Massachusetts; MO: Missouri.

**Supplementary Figure 13. Meta-analysis stratified on vaginally delivered infants for the effects of non-exclusive vs. exclusive breastfeeding on relative abundance of gut bacterial taxa at genus level in infants  $\leq 6$  months.**

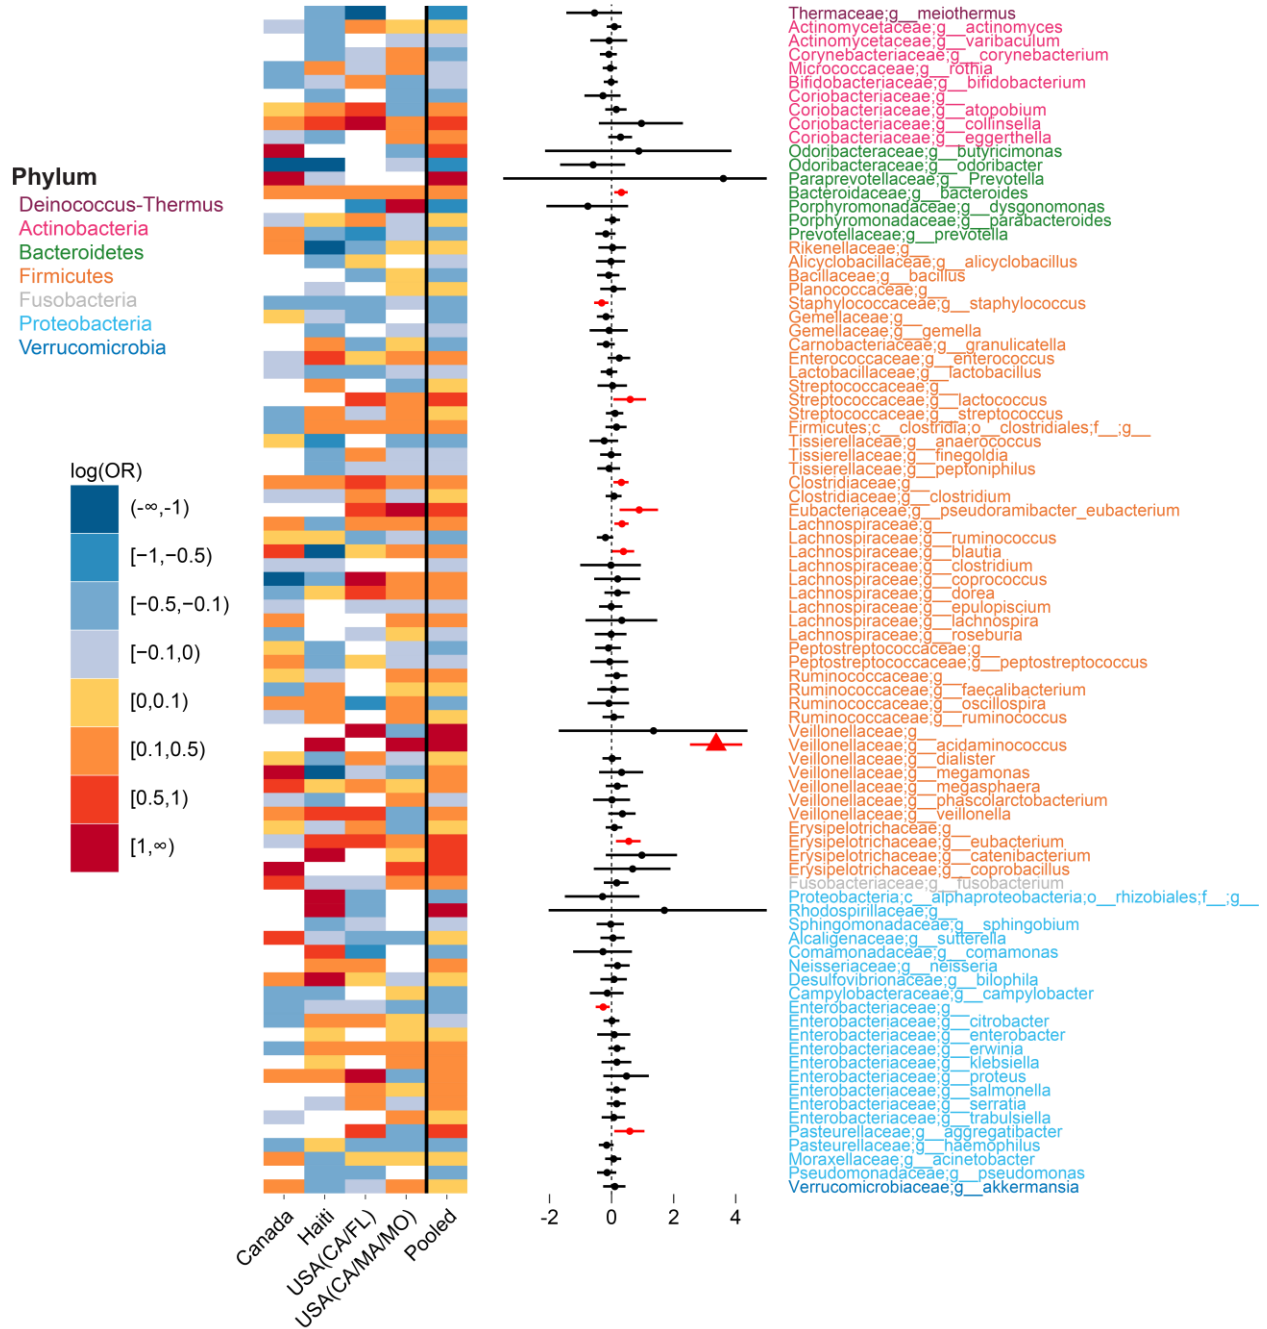

Heatmap of log(odds ratio) (log(OR)) of relative abundances of all gut bacterial genera between non-exclusively breastfed (non-EBF) vs. exclusively breastfed (EBF) infants for each study and

forest plot of pooled estimates across four studies (with available mode of delivery information) and 95% confidence intervals (95% CI).

All log(OR) estimates of each bacterial taxa from each study were from Generalized Additive Models for Location Scale and Shape (GAMLSS) with beta zero inflated family (BEZI) and were adjusted for age of infants at sample collection. Pooled log(OR) estimates and 95% CI (forest plot) were from random effect meta-analysis models based on the adjusted log(OR) estimates and corresponding standard errors of all included studies.

Pooled log(OR) estimates with pooled p-values <0.05 are in red and those with false discovery rate (FDR) adjusted pooled p-values <0.1 are shown as triangles.

Missing (unavailable) values are in white.

USA: United States of America; CA: California; FL: Florida; MA: Massachusetts; MO: Missouri.

**Supplementary Figure 14. Meta-analysis stratified on C-section delivered infants for the effects of non-exclusive vs. exclusive breastfeeding on relative abundance of gut bacterial taxa at genus level in infants  $\leq 6$  months.**

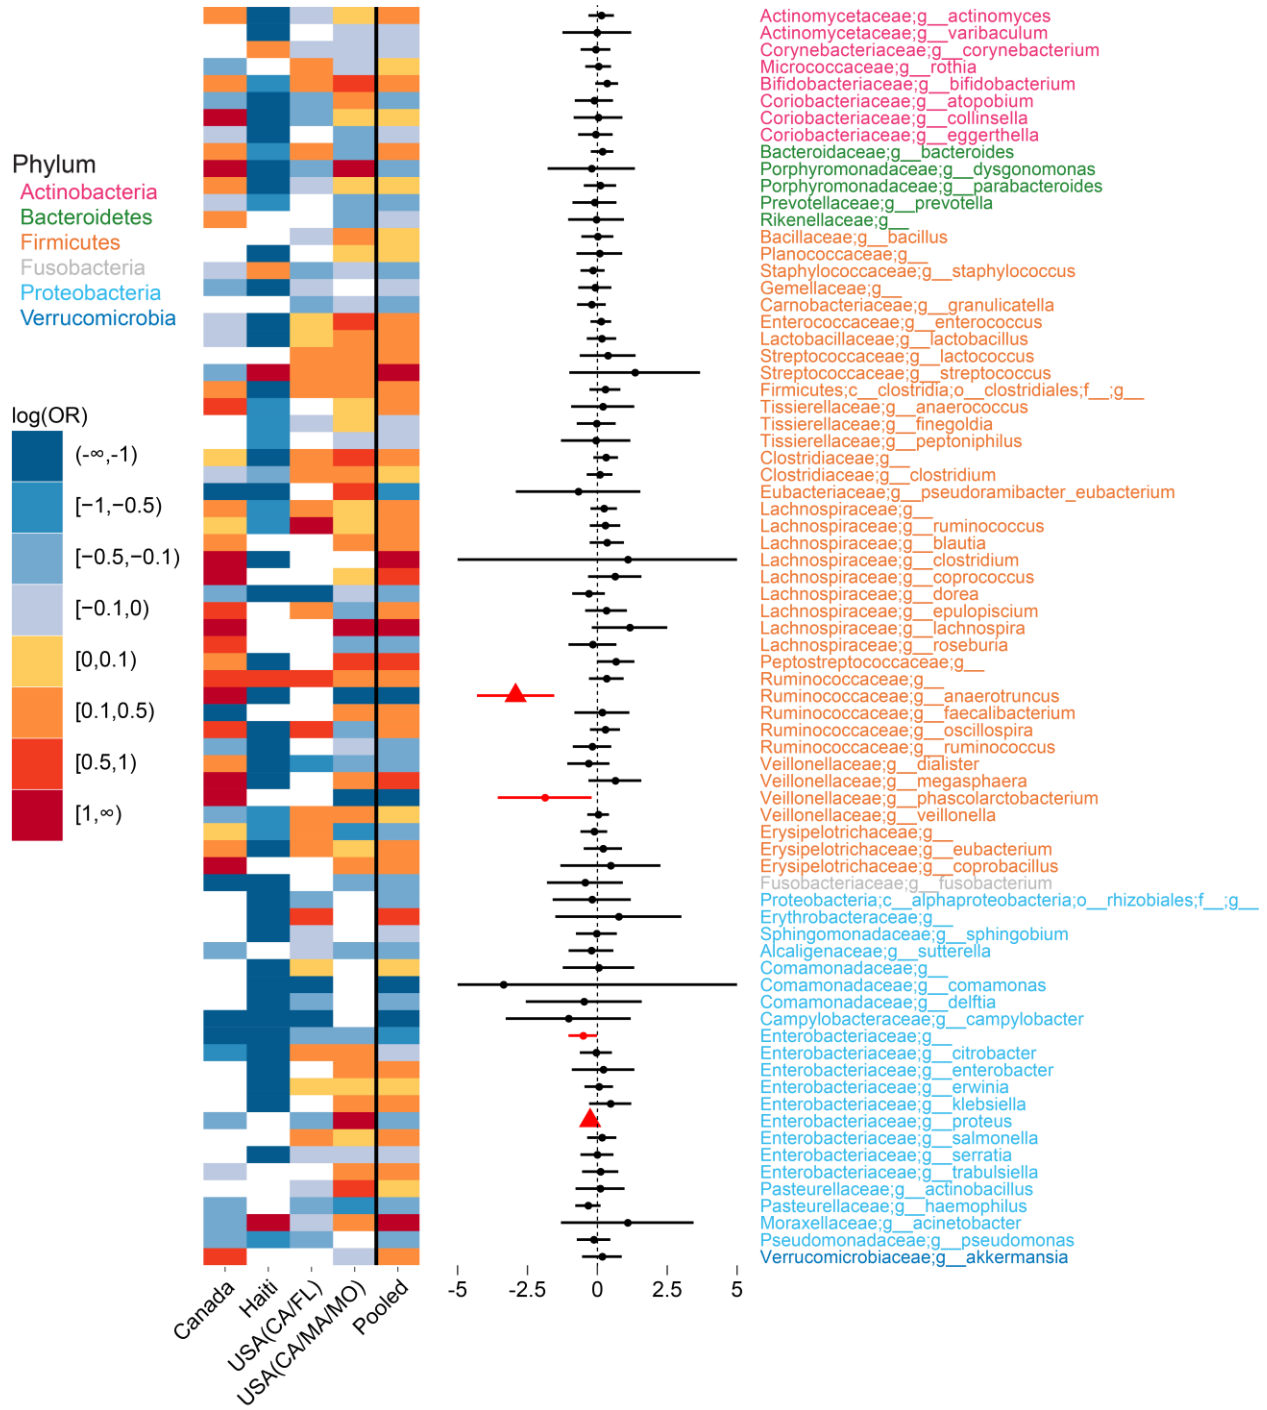

Heatmap of log(odds ratio) ( $\log(\text{OR})$ ) of relative abundances of all gut bacterial genera between non-exclusively breastfed (non-EBF) vs. exclusively breastfed (EBF) infants for each study and forest plot of pooled estimates across four studies (with available mode of delivery information) and 95% confidence intervals (95% CI).

All  $\log(\text{OR})$  estimates of each bacterial taxa from each study were from Generalized Additive Models for Location Scale and Shape (GAMLSS) with beta zero inflated family (BEZI) and were adjusted for age of infants at sample collection. Pooled  $\log(\text{OR})$  estimates and 95% CI (forest plot) were from random effect meta-analysis models based on the adjusted  $\log(\text{OR})$  estimates and corresponding standard errors of all included studies.

Pooled  $\log(\text{OR})$  estimates with pooled  $p$ -values  $< 0.05$  are in red and those with false discovery rate (FDR) adjusted pooled  $p$ -values  $< 0.1$  are shown as triangles.

Missing (unavailable) values are in white.

USA: United States of America; CA: California; FL: Florida; MA: Massachusetts; MO: Missouri.

**Supplementary Figure 15. Analysis adjusting for infant age vs. analysis adjusting for both infant age and sex for the effects of non-exclusive vs. exclusive breastfeeding on relative abundance of gut bacterial taxa at phylum level in infants  $\leq 6$  months.**

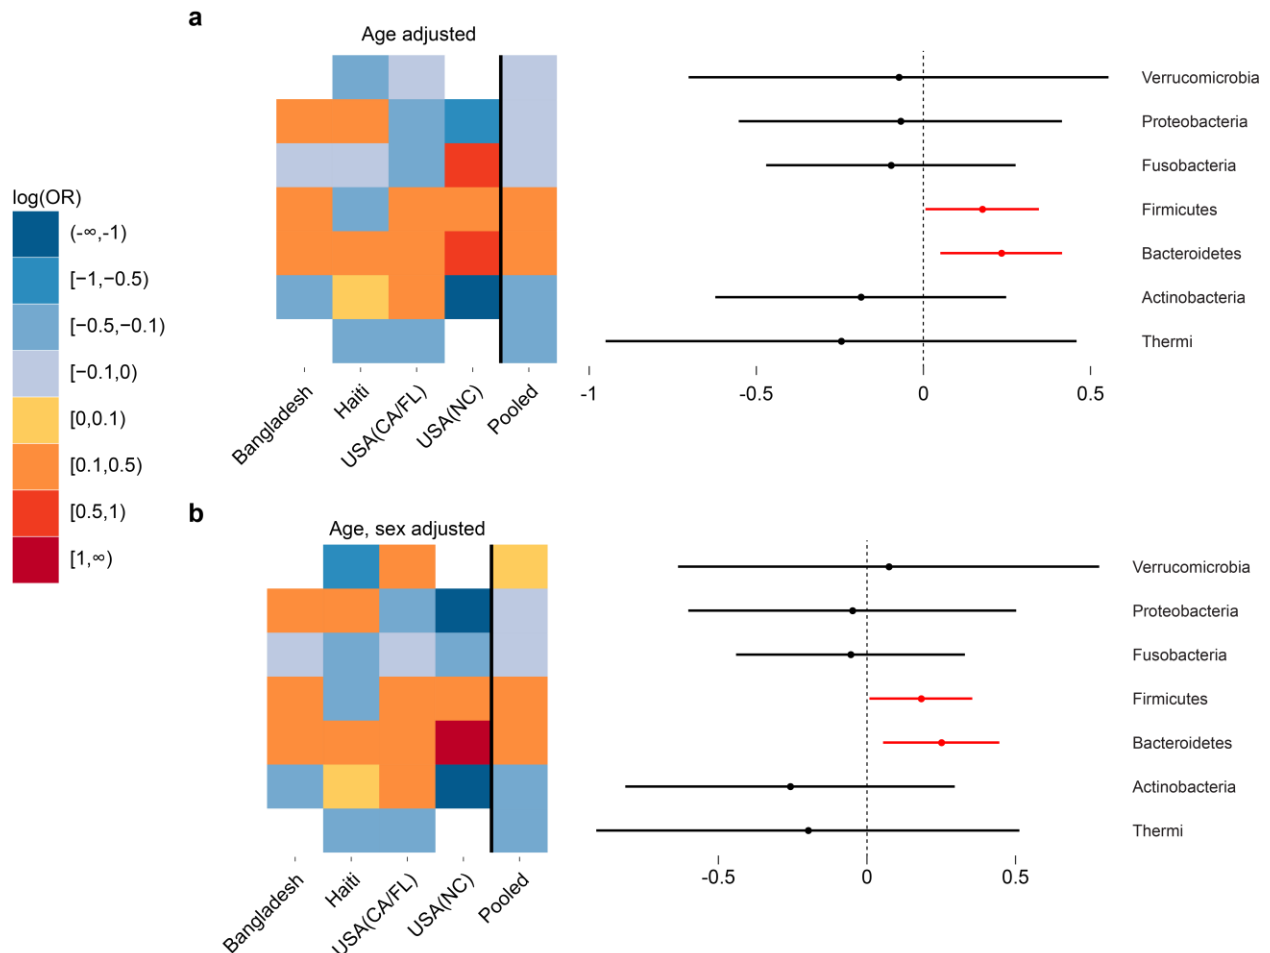

**a.** Non-exclusive breastfeeding (non-EBF) vs. EBF adjusting for infant age.

**b.** Non-EBF vs. EBF adjusting for infant age and sex.

The analysis was done in a subset of four studies with available data on infant sex (Bangladesh, Haiti, USA [California-Florida], USA [North Carolina]).

The figures show heatmap of log(odds ratio) (log(OR)) of relative abundances of all gut bacterial phyla between non-exclusively breastfed (non-EBF) vs. exclusively breastfed (EBF) infants for



each study and forest plot of pooled estimates across four studies with 95% confidence intervals (95% CI).

All log(OR) estimates of each bacterial phylum from each study were from Generalized Additive Models for Location Scale and Shape (GAMLSS) with zero inflated beta family (BEZI) and were adjusted for infant age at sample collection (a) or adjusted for both infant age at sample collection and infant sex (b). Pooled log(OR) estimates and 95% CI (forest plot) were from random effect meta-analysis models based on the adjusted log(OR) estimates and corresponding standard errors of all included studies. Pooled log(OR) estimates with pooled p-values < 0.05 are in red and those with false discovery rate (FDR) adjusted pooled p-values < 0.1 are shown as triangles. Missing (unavailable) values are in white.

USA: United States of America; CA: California; FL: Florida; NC: North Carolina.

**Supplementary Figure 16. Meta-analysis of seven included studies for the effects of non-exclusive vs. exclusive breastfeeding on relative abundances of gut microbial KEGG pathways at level two in infants  $\leq 6$  months.**

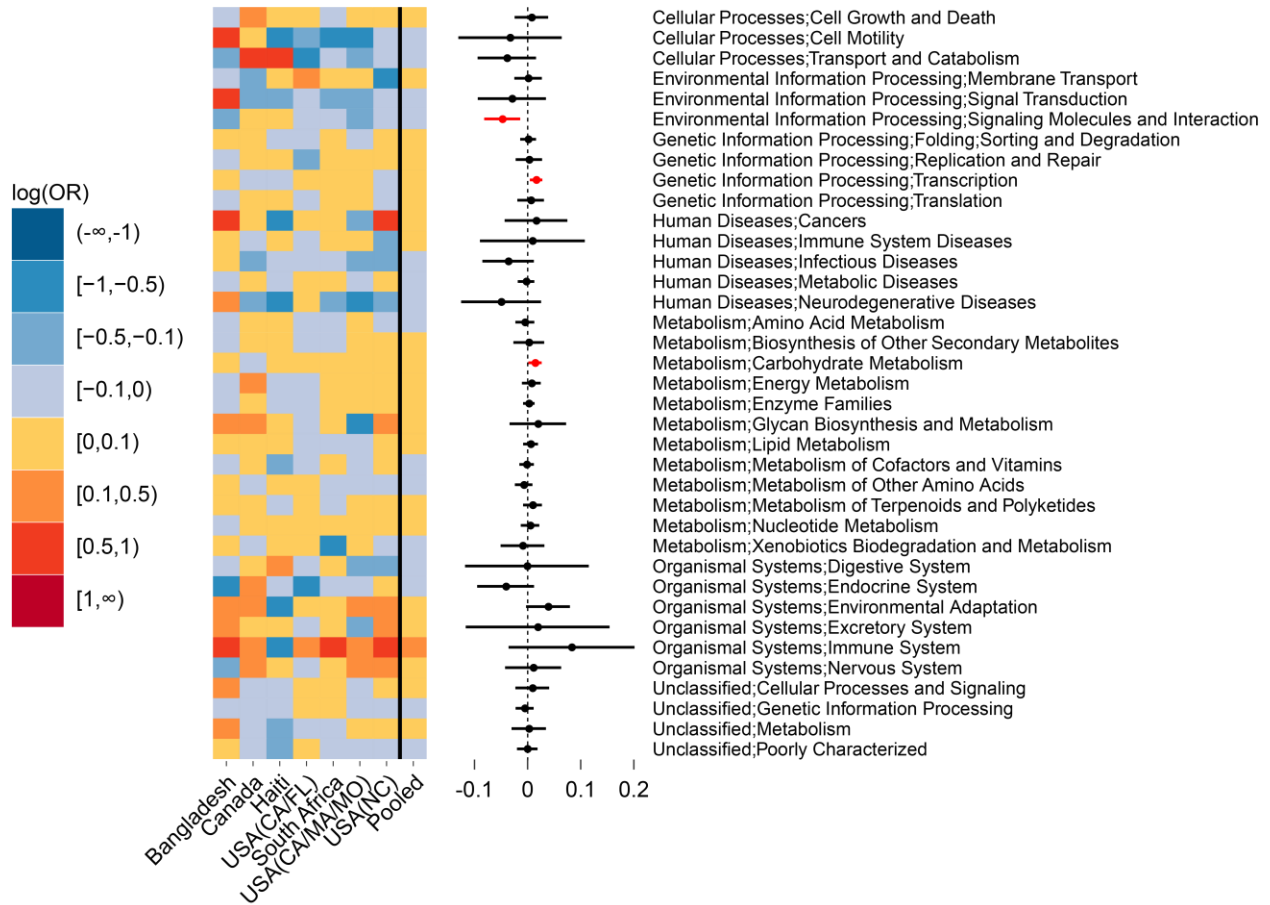

Heatmap of log(odds ratio) (log(OR)) of relative abundances of all gut microbial KEGG pathways at level 2 between non-exclusively breastfed (non-EBF) vs. exclusively breastfed (EBF) infants for each study and forest plot of pooled estimates of all studies with 95% confidence intervals (95% CI). All log(OR) estimates of each pathway from each study were from Generalized Additive Models for Location Scale and Shape (GAMLSS) with beta zero inflated family (BEZI) and were adjusted for age of infants at sample collection. Pooled log(OR) estimates and 95% CI (forest plot) were from random effect meta-analysis models based on the adjusted log(OR) estimates and corresponding standard errors of all included studies.

Pooled log(OR) estimates with pooled p-values <0.05 are in red and those with false discovery rate (FDR) adjusted pooled p-values <0.1 are shown as triangles.

KEGG: Kyoto Encyclopedia of Genes and Genomes; USA: United States of America; CA: California; FL: Florida; MA: Massachusetts; MO: Missouri; NC: North Carolina.

**Supplementary Figure 17. Analysis adjusting for infant age vs. analysis adjusting for both infant age and sex for the effects of non-exclusive vs. exclusive breastfeeding on relative abundances of gut microbial KEGG pathways at level three in infants  $\leq 6$  months.**

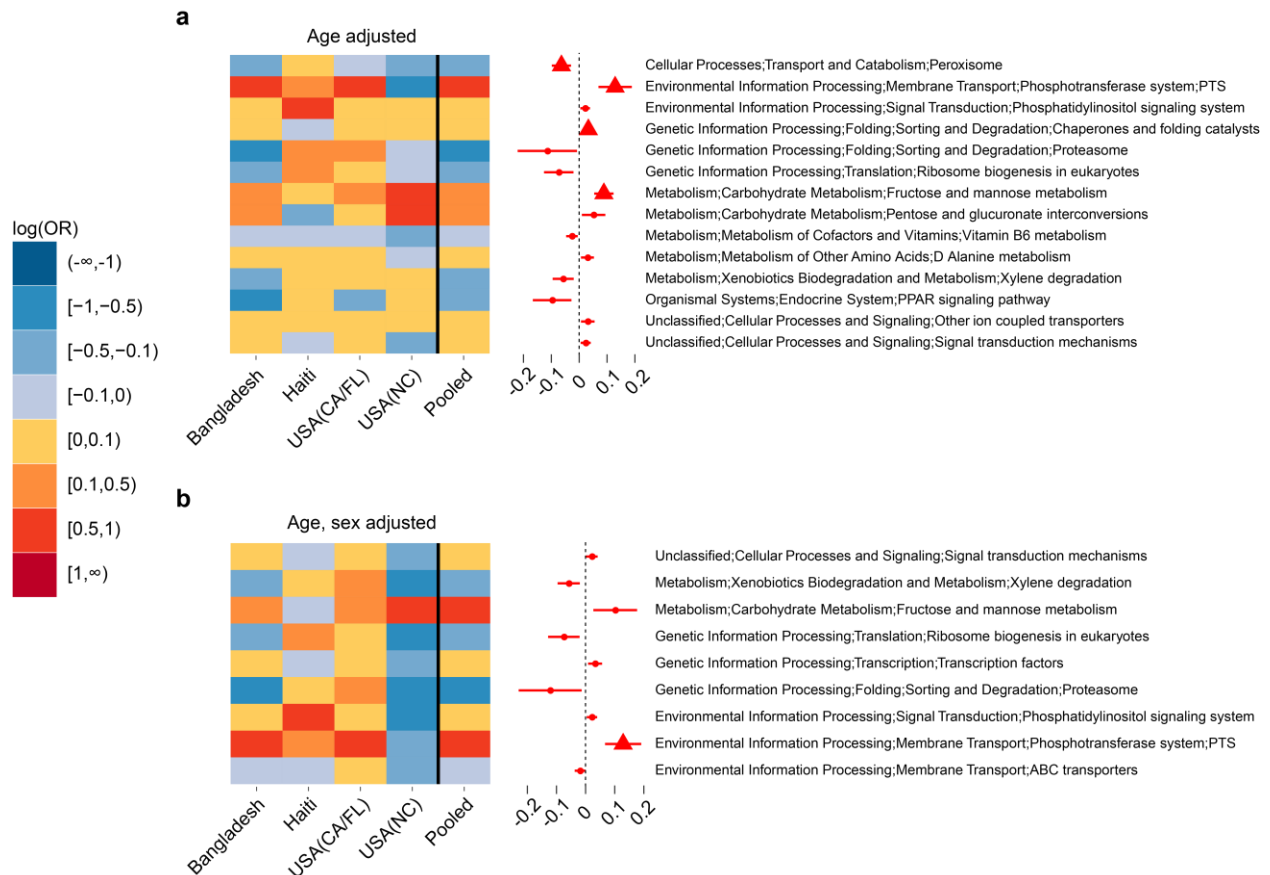

**a.** Non-exclusive breastfeeding (non-EBF) vs. EBF adjusting for infant age.

**b.** Non-EBF vs. EBF adjusting for infant age and sex.

The analysis was done in a subset of four studies with available data on infant sex (Bangladesh, Haiti, USA [California-Florida], USA [North Carolina]).

The figures show heatmap of log(odds ratio) (log(OR)) of relative abundances of gut microbial KEGG pathways at level 3 between non-exclusively breastfed (non-EBF) vs. exclusively breastfed (EBF) infants for each study and forest plot of pooled estimates of four studies with 95% confidence intervals (95% CI).

All log(OR) estimates of each pathway from each study were from Generalized Additive Models for Location Scale and Shape (GAMLSS) with zero inflated beta family (BEZI) and were adjusted for infant age at sample collection (a) or adjusted for both infant age at sample collection and infant sex (b). Pooled log(OR) estimates and 95% CI (forest plot) were from random effect meta-analysis models based on the adjusted log(OR) estimates and corresponding standard errors of all included studies. Pooled log(OR) estimates with pooled p-values <0.05 are in red and those with false discovery rate (FDR) adjusted pooled p-values <0.1 are in triangle shape. Only pathways with FDR adjusted pooled p-value <0.1 are shown.

KEGG: Kyoto Encyclopedia of Genes and Genomes; USA: United States of America; CA: California; FL: Florida; NC: North Carolina.

**Supplementary Figure 18. Longer duration of exclusive breastfeeding is associated with reduced effects of diarrhea at the time of stool sample collection on gut microbial diversity of infants from 6 months to 2 years of age.**

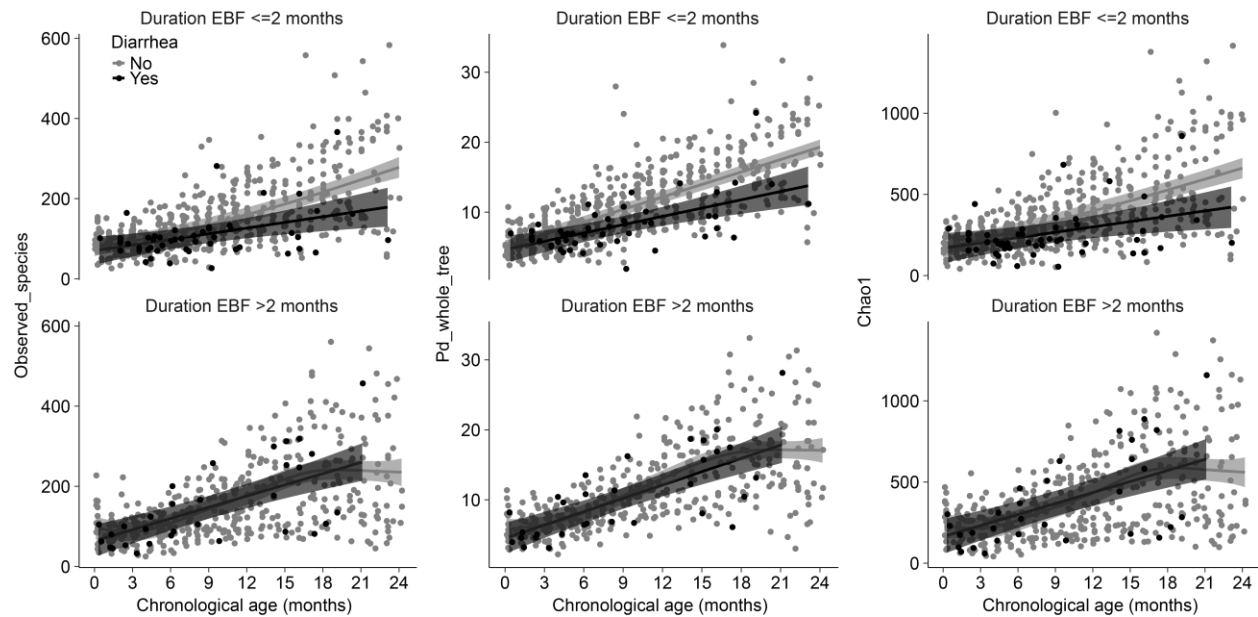

Alpha diversity indexes: Observed species, Phylogenetic diversity whole tree (PD\_whole\_tree) and Chao1 are shown.

Fitted lines and 95% confidence intervals (95% CI) were from Generalized Additive Mixed models (GAMM).

## **Supplementary Notes**

### **Supplementary Note 1. List of Canadian Healthy Infant Longitudinal Development**

#### **(CHILD) study investigators.**

Subbarao P (Director), The Hospital for Sick Children & University of Toronto; Turvey SE (co-Director), University of British Columbia; Sears MR, (Founding Director), McMaster University; Anand SS, McMaster University; Becker AB, University of Manitoba; Befus AD, University of Alberta; Brauer M, University of British Columbia; Brook JR, University of Toronto; Chen E, Northwestern University, Chicago; Cyr MM, McMaster University; Daley D, University of British Columbia; Dell SD, The Hospital for Sick Children & University of Toronto; Denburg JA, McMaster University; Duan QL, Queen's University; Eiwegger T, The Hospital for Sick Children & University of Toronto; Grasemann H, The Hospital for Sick Children & University of Toronto; HayGlass K, University of Manitoba; Hegele RG, The Hospital for Sick Children & University of Toronto; Holness DL, University of Toronto; Hystad P, Oregon State University; Kobor M, University of British Columbia; Kollmann TR, University of British Columbia; Laprise C, Université du Québec à Chicoutimi; Lou WYW, University of Toronto; Macri J, McMaster University; Mandhane PJ, University of Alberta; Miller G, Northwestern University, Chicago; Moraes TJ, The Hospital for Sick Children & University of Toronto; Paré P, University of British Columbia; Ramsey C, University of Manitoba; Ratjen F, The Hospital for Sick Children & University of Toronto; Sandford A, University of British Columbia; Scott JA, University of Toronto; Scott J, University of Toronto; Silverman F, University of Toronto; Simons E, University of Manitoba; Takaro T, Simon Fraser University; Tebbutt SJ, University of British Columbia; To T, The Hospital for Sick Children & University of Toronto.
